# Supplementary material
Source: Research Square preprint supplement (doi:10.21203/rs.3.rs-10243396/v1)

**Supplemental Online Content**

eAppendix 1. Detailed search strategies.

eTable 1. Publication source, design, and data-status details

eTable 2. Eligibility criteria and imaging-selection details

eTable 3. Baseline disease burden and analysis populations

eTable 4. Previous treatment and metastatic-history details

eTable 5. Treatment regimen, exposure, and comparator details

eTable 6. Additional efficacy endpoints from study-level extraction

eTable 7. Patient-reported, pain, and opioid-related outcomes

eTable 8. Additional safety outcomes

eTable 9. Summary of analysis-ready effect-size dataset used for forest plots

eTable 10. RoB 2.0 judgments for supportive endpoints by randomized trial.

eTable 11. Subgroup-stratified sensitivity analysis summary.

eFigure 1. Post-chemo / late-line mCRPC forest plots (PFS/rPFS, OS, PSA50, ORR).

eFigure 2. Taxane-naive mCRPC forest plots (PFS/rPFS, OS, PSA50, ORR).

eFigure 3. mHSPC upfront intensification forest plots (PFS/rPFS, OS, ORR).

eFigure 4. mHSPC sensitivity-analysis forest plots (PFS/rPFS, ORR).

eFigure 5. Oligometastatic/oligorecurrent HSPC forest plots (PFS/rPFS, PSA50).

eFigure 6. Docetaxel-comparator chemotherapy-naive mCRPC forest plots (PFS/rPFS, PSA50).

eFigure 7. Evidence distribution summary across included clinical subgroups.

eFigure 8. Grade >=3 adverse event forest plots.

eFigure 9. Risk-of-bias summary for included randomized trials.

eFigure 10. Overall PFS/rPFS funnel plot.

**e****Appendix 1. Detailed search strategies**

Searches were designed for randomized studies evaluating prostate-specific membrane antigen radioligand therapy in prostate cancer. Searches were run from database inception through June 17, 2026. No language restriction was applied at the search stage.

**Core concept blocks**

| **Concept** | **Terms** |
| --- | --- |
| **Population** | "prostate cancer" OR "prostatic neoplasm*" OR mCRPC OR CRPC OR mHSPC OR "hormone-sensitive prostate cancer" OR "castration-resistant prostate cancer" |
| **Target** | PSMA OR "prostate-specific membrane antigen" OR "prostate specific membrane antigen" |
| **Therapy** | "radioligand therap*" OR "radionuclide therap*" OR "targeted radionuclide therap*" OR "radiopharmaceutical therap*" OR theranostic* OR lutetium OR "lutetium-177" OR "177Lu" OR "Lu-177" OR "Lu PSMA" OR "Lu-PSMA" OR "PSMA-617" OR Pluvicto OR PNT2002 OR "PSMA-I&T" OR "PSMA I&T" OR actinium OR "actinium-225" OR "225Ac" |
| **Study design** | random* OR trial OR "clinical trial" OR "phase 2" OR "phase II" OR "phase 3" OR "phase III" OR interventional OR prospective |

**PubMed/MEDLINE**

| **Platform** | **PubMed** |
| --- | --- |
| **Search date** | Inception to June 17, 2026 |
| **Search strategy** | (("Prostatic Neoplasms"[Mesh] OR "prostate cancer"[tiab] OR "prostatic cancer"[tiab] OR "prostatic neoplasm*"[tiab] OR "prostate neoplasm*"[tiab] OR mCRPC[tiab] OR CRPC[tiab] OR mHSPC[tiab] OR "metastatic castration-resistant prostate cancer"[tiab] OR "metastatic castration resistant prostate cancer"[tiab] OR "castration-resistant prostate cancer"[tiab] OR "hormone-sensitive prostate cancer"[tiab] OR "hormone sensitive prostate cancer"[tiab]) AND ("Prostate-Specific Membrane Antigen"[Mesh] OR PSMA[tiab] OR "prostate-specific membrane antigen"[tiab] OR "prostate specific membrane antigen"[tiab]) AND ("radioligand therapy"[tiab] OR "radioligand therapies"[tiab] OR "radioligand treatment"[tiab] OR "radionuclide therapy"[tiab] OR "targeted radionuclide therapy"[tiab] OR "radiopharmaceutical therapy"[tiab] OR theranostic*[tiab] OR lutetium[tiab] OR "lutetium-177"[tiab] OR "177Lu"[tiab] OR "Lu-177"[tiab] OR "Lu PSMA"[tiab] OR "Lu-PSMA"[tiab] OR "LuPSMA"[tiab] OR "PSMA-617"[tiab] OR Pluvicto[tiab] OR PNT2002[tiab] OR "PSMA-I&T"[tiab] OR "PSMA I&T"[tiab] OR actinium[tiab] OR "actinium-225"[tiab] OR "225Ac"[tiab]) AND (randomized controlled trial[pt] OR controlled clinical trial[pt] OR clinical trial[pt] OR random*[tiab] OR randomised[tiab] OR randomized[tiab] OR trial[tiab] OR "phase 2"[tiab] OR "phase II"[tiab] OR "phase 3"[tiab] OR "phase III"[tiab] OR interventional[tiab] OR prospective[tiab])) |
| **Limits/notes** | Fields: MeSH and title/abstract. No language restriction. Animal-only records can be removed during screening if needed. |

**Cochrane CENTRAL**

| **Platform** | **Cochrane Library, CENTRAL** |
| --- | --- |
| **Search date** | Inception to June 17, 2026 |
| **Search strategy** | ([mh "Prostatic Neoplasms"] OR ("prostate cancer" OR "prostatic cancer" OR "prostatic neoplasm*" OR "prostate neoplasm*" OR mCRPC OR CRPC OR mHSPC OR "metastatic castration-resistant prostate cancer" OR "castration-resistant prostate cancer" OR "hormone-sensitive prostate cancer"):ti,ab,kw) AND ([mh "Prostate-Specific Membrane Antigen"] OR (PSMA OR "prostate-specific membrane antigen" OR "prostate specific membrane antigen"):ti,ab,kw) AND (("radioligand therap*" OR "radioligand treatment" OR "radionuclide therap*" OR "targeted radionuclide therap*" OR "radiopharmaceutical therap*" OR theranostic* OR lutetium OR "lutetium-177" OR "177Lu" OR "Lu-177" OR "Lu PSMA" OR "Lu-PSMA" OR LuPSMA OR "PSMA-617" OR Pluvicto OR PNT2002 OR "PSMA-I&T" OR "PSMA I&T" OR actinium OR "actinium-225" OR "225Ac"):ti,ab,kw) |
| **Limits/notes** | CENTRAL already focuses on clinical trials; an additional randomized filter is not required. |

**Scopus**

| **Platform** | **Scopus** |
| --- | --- |
| **Search date** | Inception to June 17, 2026 |
| **Search strategy** | TITLE-ABS-KEY("prostate cancer" OR "prostatic cancer" OR "prostatic neoplasm*" OR "prostate neoplasm*" OR mCRPC OR CRPC OR mHSPC OR "metastatic castration-resistant prostate cancer" OR "metastatic castration resistant prostate cancer" OR "castration-resistant prostate cancer" OR "hormone-sensitive prostate cancer" OR "hormone sensitive prostate cancer") AND TITLE-ABS-KEY(PSMA OR "prostate-specific membrane antigen" OR "prostate specific membrane antigen") AND TITLE-ABS-KEY("radioligand therap*" OR "radioligand treatment" OR "radionuclide therap*" OR "targeted radionuclide therap*" OR "radiopharmaceutical therap*" OR theranostic* OR lutetium OR "lutetium-177" OR "177Lu" OR "Lu-177" OR "Lu PSMA" OR "Lu-PSMA" OR LuPSMA OR "PSMA-617" OR Pluvicto OR PNT2002 OR "PSMA-I&T" OR "PSMA I&T" OR actinium OR "actinium-225" OR "225Ac") AND TITLE-ABS-KEY(random* OR trial OR "clinical trial" OR "phase 2" OR "phase II" OR "phase 3" OR "phase III" OR interventional OR prospective) |
| **Limits/notes** | Fields: title, abstract, keywords. Export all records with DOI, abstract, and citation metadata. |

**Web of Science Core Collection**

| **Platform** | **Web of Science** |
| --- | --- |
| **Search date** | Inception to June 17, 2026 |
| **Search strategy** | TS=("prostate cancer" OR "prostatic cancer" OR "prostatic neoplasm*" OR "prostate neoplasm*" OR mCRPC OR CRPC OR mHSPC OR "metastatic castration-resistant prostate cancer" OR "metastatic castration resistant prostate cancer" OR "castration-resistant prostate cancer" OR "hormone-sensitive prostate cancer" OR "hormone sensitive prostate cancer") AND TS=(PSMA OR "prostate-specific membrane antigen" OR "prostate specific membrane antigen") AND TS=("radioligand therap*" OR "radioligand treatment" OR "radionuclide therap*" OR "targeted radionuclide therap*" OR "radiopharmaceutical therap*" OR theranostic* OR lutetium OR "lutetium-177" OR "177Lu" OR "Lu-177" OR "Lu PSMA" OR "Lu-PSMA" OR LuPSMA OR "PSMA-617" OR Pluvicto OR PNT2002 OR "PSMA-I&T" OR "PSMA I&T" OR actinium OR "actinium-225" OR "225Ac") AND TS=(random* OR trial OR "clinical trial" OR "phase 2" OR "phase II" OR "phase 3" OR "phase III" OR interventional OR prospective) |
| **Limits/notes** | Field: Topic Search (TS). Include all document types relevant to articles, early access, proceedings papers, and meeting abstracts if protocol permits. |

**ClinicalTrials.gov**

| **Platform** | **ClinicalTrials.gov advanced search** |
| --- | --- |
| **Search date** | Inception to June 17, 2026 |
| **Search strategy** | Condition/disease: prostate cancer Other terms: (PSMA OR "prostate-specific membrane antigen" OR "prostate specific membrane antigen") AND ("radioligand therapy" OR "radionuclide therapy" OR "targeted radionuclide therapy" OR lutetium OR "lutetium-177" OR "177Lu" OR "Lu-177" OR "PSMA-617" OR Pluvicto OR PNT2002 OR "PSMA-I&T" OR actinium OR "actinium-225" OR "225Ac") Study type: Interventional studies Status: All studies Phase: Phase 1/2, Phase 2, Phase 2/3, Phase 3, Phase 4 Manual screen: randomized allocation, prospective comparative design, or randomized phase 2/3 trial |
| **Limits/notes** | Registry results should be screened manually for randomized allocation, disease setting, intervention, comparator, endpoints, and availability of posted results. |

**eTable 1.** Publication source, design, and data-status details

| **Study** | **Trial** | **Journal/year** | **Country/sites** | **Phase/design** | **Funding/sponsor** | **Source ID** | **Data status** | **Data cutoff/notes** |
| --- | --- | --- | --- | --- | --- | --- | --- | --- |
| **Sartor et al., 2021** | VISION | N Engl J Med; 2021 | North America/Europe; 84 | P3; open-label; 2:1 | Endocyte, a Novartis company | DOI 10.1056/NEJMoa2107322; PMID 34161051; NCT03511664 | NR | NR |
| **Hofman et al., 2021** | TheraP | Lancet; 2021 | Australia; 11 | P2; open-label/unblinded; 1:1 | Australian and New Zealand Urogenital and Prostate Cancer Trials Group; Prostate Cancer. | DOI 10.1016/S0140-6736(21)00237-3; PMID 33581798; NCT03392428 | NR | NR |
| **Morris et al., 2024** | PSMAfore | Lancet; 2024 | North America/Europe; 74 | P3; open-label; BICR for radiographic endpoints; 1:1 | Novartis | DOI 10.1016/S0140-6736(24)01653-2; PMID 39293462; NCT04689828 | NR | NR |
| **SPLASH, 2024** | SPLASH | ESMO Congress 2024/Lantheus primary analysis press release; 2024 | US/Canada/Europe/UK; NR | P3; open-label; rPFS and ORR by BICR/central assessment; 2:1 | Lantheus/POINT Biopharma | NCT04647526 | Conference/press-release data; full manuscript pending; sensitivity/evidence-map source | Conference/press-release data; full manuscript pending |
| **Emmett et al., 2024** | ENZA-p | Lancet Oncol; 2024 | Australia; 15 | P2; open-label; 1:1 | Prostate Cancer Research Alliance, St Vincent's Clinic Foundation, GenesisCare, Roy. | DOI 10.1016/S1470-2045(24)00135-9; PMID 38621400; NCT04419402 | NR | NR |
| **Satapathy et al., 2022** | Satapathy chemotherapy-naive mCRPC trial | Eur J Nucl Med Mol Imaging; 2022 | India; 1 | P2; open-label; 1:1 | Investigator-initiated | DOI 10.1007/s00259-021-05618-3; PMID 34842950; CTRI/2019/12/022282 | NR | NR |
| **Chi et al., 2025** | CCTG PR.21/PLUDO | Annals of Oncology, ESMO 2025 abstract LBA89; 2025 | Canada; Multicentre; exact number NR | P2; open-label; 1:1 | Novartis; Canadian Cancer Society Grant #400396 | DOI 10.1016/j.annonc.2025.09.105; NCT04663997 | Conference/press-release data; full manuscript pending; sensitivity/evidence-map source | NR Data from uploaded Annals of Oncology ESMO 2025 LBA89 abstract, DOI 10.1016/j.annonc.2025. |
| **Azad et al., 2024** | UpFrontPSMA | Lancet Oncol; 2024 | Australia; 11 | P2; open-label; neither pts nor investigators were masked; 1:1 | Prostate Cancer Research Alliance; US Department of Defence | DOI 10.1016/S1470-2045(24)00440-6; PMID 39293461; NCT04343885 | NR | NR |
| **Satapathy et al., 2025** | CONSOLIDATE | J Nucl Med; 2025 | India; 1 | P2; open-label; 1:1 | Investigator-initiated; no potential conflict of interest reported | DOI 10.2967/jnumed.125.269913; PMID 40404393; CTRI/2021/01/030267 | NR | NR |
| **Tagawa et al., 2025** | PSMAddition | ESMO Congress 2025 oral presentation; 2025 | International; NR | P3; open-label; BIRC assessment for rPFS/rPD; 1:1 | Novartis; presentation supported by Novartis | NCT04720157 | Conference/press-release data; full manuscript pending; sensitivity/evidence-map source | 2025-01-13 Data from Tagawa Oral LBA6 ESMO 2025 presentation, data cutoff 13 Jan 2025; median. |
| **Prive et al., 2026** | BULLSEYE | Lancet Oncol; 2026 | Netherlands/Cyprus; 4 centers: 3 academic hospitals in the Netherlands and 1 community. | P2; open-label; 1:1 | Dutch Prostate Cancer Foundation and Novartis | DOI 10.1016/S1470-2045(25)00762-4; PMID 41926960; NCT04443062 | NR | NR |
| **Kishan et al., 2025** | LUNAR | J Clin Oncol; 2025 | USA; 1 | P2; open-label; no blinded central reads; 1:1 | Lantheus; National Institutes of Health | DOI 10.1200/JCO-25-01553; PMID 41223345; NCT05496959 | NR | NR |

**Abbreviations:** NCT, ClinicalTrials.gov identifier; NR, not reported.

**eTable 2.** Eligibility criteria and imaging-selection details

| **Study** | **Disease stage** | **Disease setting** | **Prior therapy requirements** | **PSMA PET** | **FDG PET** | **Key inclusion** | **Key exclusion** | **Screening/imaging counts** |
| --- | --- | --- | --- | --- | --- | --- | --- | --- |
| **Sartor et al., 2021** | PSMA-positive mCRPC | Progressive mCRPC after >=1 ARPI and 1-2 taxane regimens | ARPI: Yes; taxane: Yes, 1-2 taxane regimens; docetaxel: Yes/mostly | 68Ga-PSMA-11 PET >=1 metastatic lesion with uptake > liver and no protocol-defined PSMA-negative exclusionary lesion | No | Adult mCRPC with >=1 metastatic lesion, progression after >=1 ARPI and 1-2 taxane regimens, PSMA-positive 68Ga-PSMA-11 PET/CT, ECOG 0-2. | Protocol-defined PSMA-negative lesions; control/SoC excluded cytotoxic chemotherapy, immunotherapy, radium-223, and investigational drugs | Screened 1179; PSMA PET: 1003; positive lesion: 954; exclusionary lesion: 87; imaging eligible: 869 |
| **Hofman et al., 2021** | PSMA-positive mCRPC | Progressive mCRPC after docetaxel, suitable for cabazitaxel, selected by PSMA and FDG PET | ARPI: Allowed; 91% in each arm had prior enzalutamide or abiraterone; taxane: Yes | 68Ga-PSMA-11 PET plus 18F-FDG PET/CT PSMA-positive disease with SUVmax >=20 at one disease site and >10 at all other. | Yes | Men with mCRPC previously treated with docetaxel; progressive disease by PCWG3 PSA criteria; cabazitaxel considered next appropriate. | Low PSMA uptake or FDG-positive/PSMA-negative discordant disease; inadequate organ function or other protocol exclusions | Screened 291; PSMA PET: 291; positive lesion: NR; exclusionary lesion: NR; imaging eligible: NR |
| **Morris et al., 2024** | PSMA-positive taxane-naive mCRPC | Progressive mCRPC after one prior ARPI; candidate for ARPI change and appropriate to delay taxane chemotherapy | ARPI: Yes; one prior ARPI progression; taxane: No | 68Ga-PSMA-11 PET >=1 PSMA-positive metastatic lesion with uptake > liver and no exclusionary PSMA-negative lesions. | No | Adults with PSMA-positive mCRPC; one progression on prior ARPI as most recent therapy; candidate for ARPI change | Prior chemotherapy for CRPC or HSPC except limited adjuvant/neoadjuvant taxane; recent immunotherapy except sipuleucel-T; recent. | Screened 585; PSMA PET: 547; positive lesion: NR; exclusionary lesion: NR; imaging eligible: 505 |
| **SPLASH, 2024** | PSMA-positive mCRPC | PSMA-expressing mCRPC after progression on an ARPI; pts refused or were not eligible for chemotherapy | ARPI: Yes; progression on ARPI therapy; taxane: No | NR PSMA-expressing/PSMA-positive mCRPC; detailed PET threshold NR in uploaded press release | NR | PSMA-expressing mCRPC; progression on ARPI therapy; refused or not eligible for chemotherapy | NR | Screened NR; PSMA PET: NR; positive lesion: NR; exclusionary lesion: NR; imaging eligible: NR |
| **Emmett et al., 2024** | PSMA-positive mCRPC | High-risk first-line mCRPC with at least two risk factors for early progression on enzalutamide | ARPI: No for mCRPC; prior abiraterone for hormone-sensitive disease permitted; taxane: No | 68Ga-PSMA-11 PET SUVmax >=15 at >=1 disease site and SUVmax >=10 at all larger measurable dz sites not affected by. | No for eligibility | Men >=18 years; mCRPC; no prior docetaxel or ARPI for mCRPC | Other active malignancies within 5 years; seizures or predisposing conditions; significant sarcomatoid/spindle cell/neuroendocrine. | Screened 220; PSMA PET: 220; positive lesion: NR; exclusionary lesion: 40/220 excluded for low PSMA expression; imaging eligible: 180/220 were. |
| **Satapathy et al., 2022** | Chemotherapy-naive PSMA-positive mCRPC | Chemotherapy-naive mCRPC with high PSMA expression on 68Ga-PSMA-11 PET/CT; prior NAADs allowed | ARPI: No; taxane: No; docetaxel: No | 68Ga-PSMA-11 PET At least 80% of lesions >=1.5 times liver uptake and no lesion uptake less than liver | No | Biopsy-proven adenocarcinoma prostate; castration-resistant disease; metastatic dz on 68Ga-PSMA-11 PET/CT with significant PSMA expression | Sarcomatous, spindle-cell, or small-cell differentiation; Sjogren syndrome | Screened 45; PSMA PET: 45; positive lesion: NR; exclusionary lesion: 5 excluded for insufficient PSMA expression; imaging eligible: 40 |
| **Chi et al., 2025** | Chemotherapy-naive, PSMA-PET-positive mCRPC progressing after ARPI therapy | mCRPC progressing after ARPI therapy; PSMA-PET positive; chemotherapy-naive for mCRPC | ARPI: Yes; progressing after ARPI therapy; taxane: No for mCRPC | PSMA PET; tracer NR in abstract PSMA-PET positive mCRPC | No/NR | Chemotherapy-naive, PSMA-PET positive mCRPC progressing after ARPI therapy | NR | Screened NR; PSMA PET: NR; positive lesion: NR; exclusionary lesion: NR; imaging eligible: NR |
| **Azad et al., 2024** | De-novo high-volume mHSPC | De-novo high-volume mHSPC with PSMA-avid disease and no major FDG-positive/PSM... | ARPI: No; taxane: No; docetaxel: No | 68Ga-PSMA-11 PET PSMA-avid disease with SUVmax >15 and high-volume metastases on 68Ga-PSMA-11 PET | Yes | Prostate adenocarcinoma without clinically significant neuroendocrine differentiation or small-cell histology; age >=18 years; <=4 weeks. | Extensive FDG-positive PSMA-negative disease; low PSMA uptake; low-volume disease on PSMA PET | Screened 166; PSMA PET: NR; positive lesion: NR; exclusionary lesion: 36/166 excluded after PET-CT scans due to low uptake, low-volume disease. |
| **Satapathy et al., 2025** | Synchronous high-volume mHSPC with residual nonprogressive PSMA-positive disease after ADT plus docetaxel | Synchronous high-volume mHSPC; post-ADT plus docetaxel residual nonprogressive PSMA-positive disease | ARPI: No; taxane: Yes; prior docetaxel in mHSPC setting before randomization | 68Ga-PSMA-11 PET VISION criteria: at least one residual lesion uptake greater than normal liver and no measurable dz. | No | Biopsy-proven prostate adenocarcinoma; de-novo/synchronous high-volume metastatic dz by CHAARTED; ADT plus up to 6 cycles docetaxel 75. | Sarcomatous/spindle cell/neuroendocrine/small cell differentiation; PSA <=0.2 ng/mL or PSA progression after docetaxel; complete response. | Screened 48; PSMA PET: NR; positive lesion: NR; exclusionary lesion: 3 pts excluded for low PSMA expression; imaging eligible: 30 randomized pts. |
| **Tagawa et al., 2025** | PSMA-positive mHSPC | Untreated or minimally treated PSMA-positive mHSPC appropriate for ADT + ARPI | ARPI: No; up to 45 days ADT/ARPI for metastatic dz allowed before entry; taxane: No | 68Ga-PSMA-11 PET >=1 PSMA-positive metastatic lesion on 68Ga-PSMA-11 PET | No | Male pts with untreated or minimally treated mHSPC, ECOG PS 0-2, >=1 PSMA-positive metastatic lesion on 68Ga-PSMA-11 PET/CT, appropriate. | NR | Screened 1529; PSMA PET: 1420; positive lesion: NR; exclusionary lesion: NR; imaging eligible: NR |
| **Prive et al., 2026** | Oligometastatic/oligorecurrent HSPC | Biochemically recurrent HSPC after radical prostatectomy or radiotherapy; <=5 PSMA-expressing metastases; not. | ARPI: No; taxane: No; docetaxel: No | 18F-PSMA-1007 or 18F-DCFPyL PET/CT At least one lesion with SUVmax >=15 and <=5 metastases; excluded lesions >1 cm. | No | Men >=18 years; recurrent HSPC after radical prostatectomy or radiotherapy; ECOG 0-1 | Eligible for salvage radiotherapy or surgery; lesions >1 cm without PSMA uptake; visceral metastases | Screened 78; PSMA PET: 78; positive lesion: NR; exclusionary lesion: 4 excluded for low PSMA expression; imaging eligible: NR |
| **Kishan et al., 2025** | Oligorecurrent HSPC | Oligorecurrent HSPC with one to five lesions on PSMA PET/CT; all lesions treatable with... | ARPI: No; taxane: No; docetaxel: No | 68Ga-PSMA or 18F tracer at screening; follow-up scans used 68Ga-PSMA-11 in the 177Lu+SBRT arm One to five lesions. | No | orHSPC with 1-5 PSMA PET/CT lesions and all sites treatable with SBRT | Castration-resistant disease; ADT within 6 months of enrollment; de novo metastatic dz | Screened 100; PSMA PET: NR; positive lesion: NR; exclusionary lesion: NR; imaging eligible: 92 enrolled/randomized |

Long narrative fields were shortened for readability; values remain RLT/control where applicable.

**eTable 3.** Baseline disease burden and analysis populations

| **Study** | **Analysis populations** | **Age** | **ECOG 0-1** | **Metastases: lung/liver/LN/bone** | **Baseline PSA** | **ALP/LDH** | **Gleason 8-10** | **Prior prostatectomy** | **Time since diagnosis** |
| --- | --- | --- | --- | --- | --- | --- | --- | --- | --- |
| **Sartor et al., 2021** | Rand. 831 (551/280); PFS: 581 (385/196); safety: 529/205; measurable dz: 184/64 | 70/71.5 | 510/551 (92.6%)/258/280 (92.1%) | Lung 49/551 (8.9%)/28/280 (10.0%); liver 63/551 (11.4%)/38/280 (13.6%); LN 274/551 (49.7%)/141/280 (50.4%); bone 504/551 (91.5%)/256/280. | 77.5/74.6 | ALP 105/94.5; LDH 221/224 | 324/551 (58.8%)/170/280 (60.7%) | 240/551 (43.6%)/130/280 (46.4%) | 7.4/7.4 |
| **Hofman et al., 2021** | Rand. 200 (99/101); PFS: 200 (99/101); safety: 98/85; measurable dz: 39/39 | 72/72 | 95/99 (96%)/96/101 (95%) | Lung NR; liver NR; LN 7/99 (7%) LN only/9/101 (9%) LN only; bone 90/99 (91%)/90/101 (89%) | 94/110 | ALP 111/130; LDH NR | 53/99 (54%)/50/101 (50%) | NR | NR |
| **Morris et al., 2024** | Rand. 468 (234/234); PFS: 468 (234/234); safety: 227/232; measurable dz: 72/72 | 71/72 | 232/234 (99.1%)/230/234 (98.3%) | Lung 21/234 (9%)/23/234 (10%); liver 13/234 (6%)/7/234 (3%); LN 76/234 (32%)/73/234 (31%); bone 205/234 (88%)/203/234 (87%) | 18.4/14.9 | ALP 100/103.5; LDH 197/196.5 | 137/234 (58.5%)/110/234 (47.0%) | NR | 5.45/6.8 |
| **SPLASH, 2024** | Rand. 412 (~ 276 by 2:1 randomization; exact randomized arm count NR in uploaded source/~ 136 by 2:1 randomization; exact. | NR | NR | Lung NR; liver NR; LN NR; bone NR | NR | ALP NR; LDH NR | NR | NR | NR |
| **Emmett et al., 2024** | Rand. 162 (83/79); PFS: 162 (83/79); safety: 81/79; measurable dz: NR/NR | 71/71 | NR | Lung NR; liver Visceral metastases 7/83 (8%)/Visceral metastases 10/79 (13%); LN NR; bone >5 bone metastases 46/83 (55%)/>5 bone metastases. | 39/33 | ALP NR; ALP >=IULN 36/83 (43%)/NR; ALP >=IULN 37/79 (47%) | NR | NR | 2.2/2.8 |
| **Satapathy et al., 2022** | Rand. 40 (20/20); PFS: 40 (20/20); safety: 20/20; measurable dz: 13/19 | 68/68 | 15/20 (75%)/14/20 (70%) | Lung 0/20 (0%)/2/20 (10%); liver 2/20 (10%)/1/20 (5%); LN Local nodes 15/20 (75%); distant nodes 8/20 (40%)/Local nodes 15/20 (75%) | 100.9/37 | ALP 185/192; LDH NR | 14/20 (70%)/12/20 (60%) | NR | 3/2 |
| **Chi et al., 2025** | Rand. 199 (100/99); PFS: NR (NR/NR); safety: NR/NR; measurable dz: NR/NR | NR | NR | Lung NR; liver NR; LN NR; bone NR | NR | ALP NR; LDH NR | NR | NR | NR |
| **Azad et al., 2024** | Rand. 130 (63/67); PFS: NR (NR/NR); safety: 63/63; measurable dz: 32/33 | 69/69 | 63/63 (100%)/62/63 (98%) | Lung NR; liver Included within M1c; 4/62 (6%) M1c at diagnosis/Included within M1c; 6/62 (10%) M1c at diagnosis | NR | ALP NR; LDH NR | Gleason grade group reported instead/NR; Gleason grade group reported instead | NR | NR |
| **Satapathy et al., 2025** | Rand. 30 (15/15); PFS: 30 (15/15); safety: 15/15; measurable dz: 15/15 | 69/68 | 11/15 (73%)/13/15 (87%) | Lung NR; liver NR; LN Pelvic nodes 13/15 (87%); distant nodes 10/15 (67%)/Pelvic nodes 12/15 (80%) | 2.9/1.9 | ALP NR; LDH NR | 10/15 (67%; Gleason score >7)/10/15 (67%; Gleason score >7) | NR | NR |
| **Tagawa et al., 2025** | Rand. 1144 (572/572); PFS: NR (NR/NR); safety: 564/565; measurable dz: 224/213 | 68/68 | 571/572 (99.8%)/562/572 (98.3%) | Lung NR; liver NR; LN NR; bone 522/572 (91.3%)/521/572 (91.1%) | 12.06/11.64 | ALP NR; LDH NR | 389/572 (68.0%)/406/572 (71.0%) | NR | NR |
| **Prive et al., 2026** | Rand. 59 (30/29); PFS: 58 (29/29); safety: 29/29; measurable dz: NR/NR | 69/72 | 29/29 (100%)/29/29 (100%) | Lung 0/29 (0%; visceral metastases excluded)/0/29 (0%; visceral metastases excluded); liver 0/29 (0% | 5.4/3.8 | ALP NR; LDH NR | 11/29 (38%)/9/29 (31%) | 22/29 (76%)/23/29 (79%) | 6/8 |
| **Kishan et al., 2025** | Rand. 92 (45/47); PFS: 87 (45/42); safety: 45/42; measurable dz: 45/42 | 69.7/70.2 | NR | Lung NR; liver NR; LN 28/45 (62.2%; N1/M1a by PSMA)/26/42 (61.9% | 1.1/1.2 | ALP NR; LDH NR | 16/45 (35.6%; ISUP grade group 4-5)/22/42 (52.4%; ISUP grade group 4-5) | NR | NR |

Unless otherwise stated, paired values are reported as RLT/control.

**eTable 4.** Previous treatment and metastatic-history details

| **Study** | **Prior ARPI** | **Prior taxane** | **Prior docetaxel/cabazitaxel** | **Previous local/systemic therapy** | **ARPI type** | **Other prior-treatment fields** |
| --- | --- | --- | --- | --- | --- | --- |
| **Sartor et al., 2021** | 1: 298/551 (54.1%)/128/280 (45.7%); 2: 213/551 (38.7%)/128/280 (45.7%); >2: 40/551 (7.3%)/24/280 (8.6%) | 1: 325/551 (59.0%)/156/280 (55.7%); 2: 220/551 (39.9%)/122/280 (43.6%) | Docetaxel 534/551 (96.9%)/273/280 (97.5%); cabazitaxel 209/551 (37.9%)/107/280 (38.2%); cabazitaxel required NR | Surgery NR; RT NR; metastatic chemo NR | NR | NR |
| **Hofman et al., 2021** | 1: 91/99 (91%) prior abiraterone and/or enzalutamide/91/101 (91%) prior abiraterone and/or enzalutamide; 2: NR; >2: NR | 1: 99/99 (100%) docetaxel/101/101 (100%) docetaxel; 2: NR; status Post-docetaxel | Docetaxel 99/99 (100%)/101/101 (100%); cabazitaxel NR; cabazitaxel required No | Surgery NR; RT NR; metastatic chemo NR | Abiraterone and/or enzalutamide; abiraterone 21/99 (21%) abiraterone only; 21/99 (21%) both abiraterone and. | NR |
| **Morris et al., 2024** | 1: 234/234 (100%)/234/234 (100%); 2: 0/234 (0%)/0/234 (0%); >2: 0/234 (0%)/0/234 (0%) | 1: NR; 2: NR; status Taxane-naive | Docetaxel NR; cabazitaxel NR; cabazitaxel required No | Surgery 82/234 (35%)/96/234 (41%); RT 150/234 (64%)/172/234 (74%); metastatic chemo 4/234 (2% | Abiraterone, enzalutamide, darolutamide, or apalutamide; abiraterone 119/234 (51%)/130/234 (56%) | NR |
| **SPLASH, 2024** | 1: NR; 2: NR; >2: NR | 1: NR; 2: NR; status Pre-chemotherapy/chemotherapy not used for trial population as reported | Docetaxel NR; cabazitaxel NR; cabazitaxel required NR | Surgery NR; RT NR; metastatic chemo NR | NR | NR |
| **Emmett et al., 2024** | 1: 12/83 (14%; prior abiraterone for hormone-sensitive disease)/9/79 (11%; prior abiraterone for hormone-sensitive disease) | 1: 44/83 (53%; early docetaxel for hormone-sensitive disease)/45/79 (57%; early docetaxel for hormone-sensitive disease) | Docetaxel 44/83 (53%; early docetaxel for hormone-sensitive disease)/45/79 (57%; early docetaxel for hormone-sensitive disease) | Surgery NR; RT NR; metastatic chemo NR | Prior abiraterone for hormone-sensitive disease permitted; enzalutamide used as study backbone; abiraterone NR | Early docetaxel HSPC 44/83 (53%)/45/79 (57%); prior abiraterone HSPC 12/83 (14%)/9/79 (11%); M1 at diagnosis 43/83. |
| **Satapathy et al., 2022** | 1: 10/20 (50%; abiraterone only)/12/20 (60%; abiraterone only) | 1: 0/20 (0%)/0/20 (0%); 2: NR; status Chemotherapy-naive | Docetaxel 0/20 (0%)/0/20 (0%); cabazitaxel NR; cabazitaxel required No | Surgery NR; RT NR; metastatic chemo NR | Abiraterone and/or enzalutamide allowed; abiraterone NR | NR |
| **Chi et al., 2025** | 1: NR; 2: NR; >2: NR | 1: NR; 2: NR; status Chemotherapy-naive mCRPC | Docetaxel NR; cabazitaxel NR; cabazitaxel required NR | Surgery NR; RT NR; metastatic chemo NR | NR | NR |
| **Azad et al., 2024** | 1: 0/63 (0%)/0/63 (0%); 2: NR; >2: NR | 1: 0/63 (0%) before protocol treatment/0/63 (0%) before protocol treatment; 2: NR; status Taxane-naive before trial treatment | Docetaxel 0/63 (0%) before protocol treatment/0/63 (0%) before protocol treatment; cabazitaxel NR; cabazitaxel required No | Surgery NR; RT NR; metastatic chemo NR | NR | NR |
| **Satapathy et al., 2025** | 1: 0/15 (0%; ARPIs not administered in mHSPC setting)/0/15 (0%; ARPIs not administered in mHSPC setting) | 1: 15/15 (100%; docetaxel before randomization)/15/15 (100%; docetaxel before randomization) | Docetaxel 15/15 (100%; six cycles completed before randomization)/15/15 (100%; six cycles completed before randomization) | Surgery NR; RT NR; metastatic chemo NR | NR | Early docetaxel HSPC NR; prior abiraterone HSPC NR; M1 at diagnosis 15/15 (100% |
| **Tagawa et al., 2025** | 1: NR; 2: NR; >2: NR | 1: NR; 2: NR; status Untreated or minimally treated mHSPC | Docetaxel NR; cabazitaxel NR; cabazitaxel required NR | Surgery NR; RT NR; metastatic chemo NR | NR | NR |
| **Prive et al., 2026** | 1: NR; 2: NR; >2: NR | 1: NR; 2: NR; status Taxane-naive | Docetaxel NR; cabazitaxel NR; cabazitaxel required NR | Surgery 22/29 (76%; radical prostatectomy)/23/29 (79%; radical prostatectomy) | NR | NR |
| **Kishan et al., 2025** | 1: 8/45 (17.8%; previous androgen receptor signaling inhibitor exposure)/9/42 (21.4%; previous androgen receptor signaling. | 1: NR; 2: NR | Docetaxel 3/45 (6.7%; previous chemotherapy exposure; agent not specified)/3/42 (7.1% | Surgery 33/45 (73.3%; radical prostatectomy)/30/42 (71.4%; radical prostatectomy) | NR | NR |

**Abbreviations:** ARPI, androgen receptor pathway inhibitor; HSPC, hormone-sensitive prostate cancer; RT, radiotherapy.

**eTable 5.** Treatment regimen, exposure, and comparator details

| **Study** | **Intervention** | **Dose/interval/cycles** | **Exposure** | **Control** | **Concomitant ADT** | **Administration/supportive care** |
| --- | --- | --- | --- | --- | --- | --- |
| **Sartor et al., 2021** | 177Lu-PSMA-617 + SOC | 7.4 GBq/200 mCi; q6w; planned 4 cycles | Exp 6.9 mo; cycles 5; median cycles NR | SOC alone Permitted hormonal treatments, bisphosphonates, radiation therapy, denosumab, glucocorticoids. | Castrate testosterone levels maintained throughout trial | NR |
| **Hofman et al., 2021** | [177Lu]Lu-PSMA-617 IV every 6 weeks for up to six cycles; starting 8.5 GBq decreasing by 0.5 GBq per cycle to. | 6.0-8.5 GBq; starting 8.5 GBq, decreasing by 0.5 GBq each cycle; q6w | Exp NR mo; cycles 5; median cycles 5 | Cabazitaxel Cabazitaxel 20 mg/m2 every 3 weeks, maximum ten cycles | NR | NR |
| **Morris et al., 2024** | 177Lu-PSMA-617 7.4 GBq/200 mCi +/-10% every 6 weeks for six cycles | 7.4 GBq/200 mCi +/-10%; q6w; planned Six cycles | Exp 8.41 mo; cycles 6; median cycles 6 | ARPI change Oral abiraterone or enzalutamide per local labelling; treating investigator selection | Castrate status maintained/standard mCRPC management | NR |
| **SPLASH, 2024** | 177Lu-PNT2002 6.8 GBq every 8 weeks for up to 4 cycles | 6.8 GBq; q8w; planned Up to 4 cycles | Exp NR mo; cycles NR; median cycles NR | ARPI change NR | NR | NR |
| **Emmett et al., 2024** | Enzalutamide 160 mg orally daily plus 177Lu-PSMA-617 7.5 GBq IV at weeks 2 and 8, with additional doses at. | 7.5 GBq; Every 6-8 weeks; adaptive dosing | Exp 13.4 mo; cycles NR; 9/83 up to two doses, 5/83 three doses, 67/83 four doses | Enzalutamide Enzalutamide 160 mg orally daily | Ongoing castration implied by mCRPC standard care | NR |
| **Satapathy et al., 2022** | 177Lu-PSMA-617 6.0-7.4 GBq/cycle every 8 weeks, up to four cycles | 6.0-7.4 GBq; q8w; planned Up to four cycles | Exp NR mo; cycles NR; median cycles NR | Docetaxel Docetaxel 75 mg/m2 IV q3wk up to 10 cycles; prednisone 5 mg twice daily | Yes; continued ADT to maintain castrate testosterone unless prior orchiectomy | NR |
| **Chi et al., 2025** | 177Lu-PSMA-617 7.4 GBq IV every 6 weeks for maximum 6 cycles | 7.4 GBq; q6w; planned 6 | Exp NR mo; cycles NR; median cycles NR | Docetaxel NR | NR | NR |
| **Azad et al., 2024** | Two cycles of 177Lu-PSMA-617 7.5 GBq every 6 weeks, followed 6 weeks later by six cycles of docetaxel 75. | 7.5 GBq; q6w for 177Lu-PSMA-617; every 3 weeks for docetaxel | Exp NR mo; cycles 2; median cycles 2 cycles 177Lu-PSMA-617 completed by all pts in RLT arm | Docetaxel + ADT Docetaxel 75 mg/m² intravenously every 3 weeks for six cycles plus continuous ADT | Yes; continuous ADT in both groups | NR |
| **Satapathy et al., 2025** | 177Lu-PSMA-617 ~7.4 GBq per cycle (+/-10%) IV over 1-2 minutes, 2 cycles at 6-week intervals, plus. | 7.4 GBq +/-10%; q6w; planned Two cycles | Exp NR mo; cycles 2; median cycles 2 | Protocol-permitted SOC alone Continuation of ADT; oral calcium and vitamin D3 | Yes | 177Lu-PSMA-617 ~7.4 GBq/cycle (+/-10%) IV over 1-2 min, 2 cycles 6 weeks apart; <=90 days from last docetaxel to first. |
| **Tagawa et al., 2025** | 177Lu-PSMA-617 7.4 GBq +/-10% every 6 weeks for 6 cycles plus ADT + ARPI | 7.4 GBq +/-10%; q6w; planned 6 | Exp NR mo; cycles NR; median cycles NR | ADT + ARPI NR | NR | NR |
| **Prive et al., 2026** | Two cycles of 7.4 GBq 177Lu-PSMA-617 every 6 weeks; two additional cycles if residual PSMA-expressing disease. | 7.4 GBq; q6w; planned 2 cycles initially | Exp NR mo; cycles 4; median cycles 4 | Deferred ADT with active monitoring No immediate treatment; active monitoring for disease progression with. | No concomitant ADT; ADT was deferred unless initiated after progression | Two cycles of 7.4 GBq every 6 weeks; two additional cycles if residual PSMA-expressing disease and no grade >=3. |
| **Kishan et al., 2025** | Two cycles of 177Lu-PNT2002 6.8 GBq/cycle, 8 weeks apart, then SBRT to all lesions | 6.8 GBq +/-10%; 8 weeks +/-1 week between cycles; planned 2 cycles | Exp NR mo; cycles NR; median cycles NR | SBRT alone SBRT to all lesions; typically 1, 3, or 5 fractions of 16-18 Gy, 9-12 Gy, or 6-8 Gy | No routine ADT; ADT within 6 months excluded | NR |

**Abbreviations:** ADT, androgen deprivation therapy; GBq, gigabecquerel.

**eTable 6.** Additional efficacy endpoints from study-level extraction

| **Study** | **OS HR; median** | **rPFS/PFS HR; median** | **SSE/time-to-event** | **PSA endpoints** | **Radiographic response** | **Other progression endpoints** |
| --- | --- | --- | --- | --- | --- | --- |
| **Sartor et al., 2021** | HR 0.62 (0.52-0.74); p=<0.001 | rPFS HR 0.4 (0.29-0.57); p=<0.001 | SSE/death HR 0.5 (0.4-0.62); events 256/385 (66%)/137/196 (70%) | PSA50 177/385 (46.0%)/14/196 (7.1%); PSA90 NR/NR; any PSA decline NR/NR | ORR 94/184 (51.1%)/2/64 (3.1%); DCR NR/NR; CR 17/184 (9.2%)/0/64 (0%) | PFS2/next-line PFS HR NR; time to chemo HR NR |
| **Hofman et al., 2021** | HR 0.97 (0.7-1.35); p=0.99 | rPFS HR 0.64 (0.46-0.88); p=0.007 | SSE/death HR NR; events NR | PSA50 65/99 (66%)/37/101 (37%); PSA90 NR/NR; any PSA decline NR/NR | ORR 19/39 (49%)/9/39 (24%); DCR NR/NR; CR NR | PFS2/next-line PFS HR NR; time to chemo HR NR |
| **Morris et al., 2024** | HR 0.91 (0.72-1.14); p=0.2 | rPFS HR 0.49 (0.39-0.61); p=NR | SSE/death HR 0.41 (0.26-0.63); events 31/234 (13%)/68/234 (29%) | PSA50 119/234 (51%)/40/234 (17%); PSA90 NR/NR; any PSA decline NR/NR | ORR 36/72 (50%)/11/72 (15%); DCR NR/NR; CR 15/72 (21%)/3/72 (4%) | PFS2/next-line PFS HR 0.86 (0.67-1.11); time to chemo HR NR |
| **SPLASH, 2024** | HR 1.11 (0.73-1.69); p=0.6154 | rPFS HR 0.71 (0.55-0.92); p=0.0088 | SSE/death HR NR; events NR | PSA50 35.7% among evaluable subjects with baseline PSA value/14.6% among evaluable subjects with baseline PSA. | ORR 38.1% by BICR; confirmed and unconfirmed ORR/12.0% by BICR; confirmed and unconfirmed ORR | PFS2/next-line PFS HR NR; time to chemo HR NR |
| **Emmett et al., 2024** | HR 0.55 (0.36-0.84); p=0.0053 | rPFS HR 0.68 (0.45-1.03); p=NR | SSE/death HR NR; events NR | PSA50 77/83 (93%)/54/79 (68%); PSA90 65/29/83/79; any PSA decline NR/NR | ORR NR; DCR NR/NR; CR NR | PFS2/next-line PFS HR NR; time to chemo HR NR |
| **Satapathy et al., 2022** | HR NR; final OS publication reports medians and log-rank p values, not overall HR | rPFS HR NR; p=NR | SSE/death HR NR; events NR | PSA50 10/20 (50%) ITT; 9/15 (60%) per protocol/8/20 (40%); PSA90 NR/NR | ORR 5/13 (39%) ITT; 5/11 (46%) per protocol/6/19 (32%); DCR NR/NR | PFS2/next-line PFS HR NR; time to chemo HR NR |
| **Chi et al., 2025** | HR 1.64 (1.14-2.35); p=0.02 two-sided | rPFS HR 1.02 (0.77-1.35); p=0.54 one-sided | SSE/death HR NR; events NR | PSA50 53%/32%; PSA90 NR/NR; any PSA decline NR/NR | ORR 16% in pts with measurable dz/8% in pts with measurable dz; DCR NR/NR; CR NR | PFS2/next-line PFS HR NR; time to chemo HR NR |
| **Azad et al., 2024** | HR 0.83 (0.38-1.83); p=0.646 | rPFS HR 0.58 (0.32-1.05); p=0.067 | SSE/death HR NR; events NR | PSA50 NR; PSA90 NR/NR; any PSA decline NR/NR | ORR 30/32 (97%)/24/33 (83%); DCR NR/NR; CR NR | PFS2/next-line PFS HR NR; time to chemo HR NR |
| **Satapathy et al., 2025** | HR NR; OS immature and planned for later analysis | rPFS HR 0.5 (0.2-1.25); p=0.116 | SSE/death HR NR; events NR | PSA50 10/15 (67%; PSA decline >=50% at 6 months from Supplemental Figure 1)/7/15 (47%; PSA decline >=50% at 6. | ORR 8/15 (53%)/1/15 (7%); DCR NR/NR; CR 2/15 (13%)/1/15 (7%) | PFS2/next-line PFS HR NR; time to chemo HR NR |
| **Tagawa et al., 2025** | HR 0.84 (0.63-1.13); p=0.125 | rPFS HR 0.72 (0.58-0.9); p=0.002 | SSE/death HR NR; events NR | PSA50 NR; PSA90 NR/NR; any PSA decline NR/NR | ORR 85.3% (95% CI 79.9-89.6); measurable soft tissue disease/80.8% (95% CI 74.8-85.8); measurable soft tissue. | PFS2/next-line PFS HR NR; time to chemo HR NR |
| **Prive et al., 2026** | HR NR; p=NR | rPFS HR NR; p=NR | SSE/death HR NR; events NR | PSA50 24/29 (83%)/0/29 (0%); PSA90 15/NR/29/NR; any PSA decline NR/NR | ORR NR; DCR NR/NR; CR NR | PFS2/next-line PFS HR NR; time to chemo HR NR |
| **Kishan et al., 2025** | HR NR; p=NR | rPFS HR NR; p=NR | SSE/death HR NR; events NR | PSA50 23/45 (52%)/13/42 (31%); PSA90 NR/NR; any PSA decline NR/NR | ORR NR; no standard RECIST ORR reported/NR; no standard RECIST ORR reported | PFS2/next-line PFS HR NR; time to chemo HR NR |

Values are RLT/control where paired. HR values are shown with 95% CIs when available.

**eTable 7.** Patient-reported, pain, and opioid-related outcomes

| **Study** | **FACT-P total** | **FACT-P TOI** | **BPI-SF pain** | **EQ-5D-5L** | **Opioid/PPI pain** | **Other QoL notes** |
| --- | --- | --- | --- | --- | --- | --- |
| **Sartor et al., 2021** | Prespec HR 0.54 (0.45-0.66); med 5.7/2.2 | HR NR; med NR | Prespec HR 0.52 (0.42-0.63); med 6.9/2.6 | Prespec HR 0.65 (0.54-0.78); med 1/0.5 | Time to opioid HR NR; PPI pain response NR/NR | NR |
| **Hofman et al., 2021** | Prespec HR NR (NR); med NR | HR NR; med NR | Prespec HR NR (NR); med NR | Prespec HR NR (NR); med NR | Time to opioid HR NR; PPI pain response 29/18/48/42 | NR |
| **Morris et al., 2024** | Prespec HR 0.61 (0.50-0.75); med 7.46/4.27 | HR 0.66 (0.53-0.8); med 7.46/4.4 | Prespec HR 0.72 (0.59-0.88); med 5.03/3.65 | Prespec HR 0.67 (0.54-0.82); med 6.28/3.88 | Time to opioid HR NR; PPI pain response NR/NR | 10.1016/S1470-2045(25)00189-5 |
| **SPLASH, 2024** | Prespec HR NR (NR); med NR | HR NR; med NR | Prespec HR NR (NR); med NR | Prespec HR NR (NR); med NR | Time to opioid HR 0.64 (0.42-0.98); PPI pain response NR/NR | NR |
| **Emmett et al., 2024** | Prespec HR NR (NR); med NR | HR NR; med NR | Prespec HR NR (NR); med NR | Prespec HR NR (NR); med NR | Time to opioid HR NR; PPI pain response 19/8/31/30 | 10.1016/S1470-2045(25)00009-9 |
| **Satapathy et al., 2022** | Prespec HR NR (NR); med NR | HR NR; med NR | Prespec HR NR (NR); med NR | Prespec HR NR (NR); med NR | Time to opioid HR NR; PPI pain response NR/NR | NR |
| **Chi et al., 2025** | Prespec HR NR (NR); med NR | HR NR; med NR | Prespec HR NR (NR); med NR | Prespec HR NR (NR); med NR | Time to opioid HR NR; PPI pain response NR/NR | NR |
| **Azad et al., 2024** | Prespec HR NR (NR); med NR | HR NR; med NR | Prespec HR NR (NR); med NR | Prespec HR NR (NR); med NR | Time to opioid HR NR; PPI pain response NR/NR | NR |
| **Satapathy et al., 2025** | Prespec HR NR (NR); med NR | HR NR; med NR | Prespec HR NR (NR); med NR | Prespec HR NR (NR); med NR | Time to opioid HR NR; PPI pain response NR/NR | NR |
| **Tagawa et al., 2025** | Prespec HR NR (NR); med NR | HR NR; med NR | Prespec HR NR (NR); med NR | Prespec HR NR (NR); med NR | Time to opioid HR NR; PPI pain response NR/NR | NR |
| **Prive et al., 2026** | Prespec HR NR (NR); med NR | HR NR; med NR | Prespec HR NR (NR); med NR | Prespec HR NR (NR); med NR | Time to opioid HR NR; PPI pain response NR/NR | NR |
| **Kishan et al., 2025** | Prespec HR NR (NR); med NR | HR NR; med NR | Prespec HR NR (NR); med NR | Prespec HR NR (NR); med NR | Time to opioid HR NR; PPI pain response NR/NR | NR |

FACT-P, Functional Assessment of Cancer Therapy-Prostate; TOI, Trial Outcome Index; BPI-SF, Brief Pain Inventory-Short Form; PPI, present pain intensity.

**eTable 8.** Additional safety outcomes

| **Study** | **Any AE / G3+ AE** | **Fatigue / dry mouth** | **GI events** | **Hematologic events** | **Renal/creatinine** | **Neurologic/muscle events** | **Treatment-related death** |
| --- | --- | --- | --- | --- | --- | --- | --- |
| **Sartor et al., 2021** | Any 519/529 (98.1%)/170/205 (82.9%); G3+ 279/529 (52.7%)/78/205 (38.0%) | Fatigue any 228/529 (43.1%)/47/205 (22.9%); G3+ 31/529 (5.9%)/3/205 (1.5%); dry mouth any 205/529 (38.8%)/1/205 (0.5%) | Nausea any 187/529 (35.3%)/34/205 (16.6%); G3+ 7/529 (1.3%)/1/205 (0.5%); diarrhea any 100/529 (18.9%)/6/205 (2.9%) | Anemia any 168/529 (31.8%)/27/205 (13.2%); G3+ 68/529 (12.9%)/10/205 (4.9%); thrombocytopenia G3+ 42/529 (7.9%)/2/205 (1.0%) | Renal any NR/529/205; G3+ NR; creatinine increased any 28/5 | Cognitive disturbance G3+ NR; muscle weakness any NR; memory impairment any NR | NR |
| **Hofman et al., 2021** | Any 85/98 (87%)/79/85 (93%); G3+ 32/98 (33%)/45/85 (53%) | Fatigue any 74/98 (76%)/64/85 (75%); G3+ 5/98 (5%)/3/85 (4%); dry mouth any 59/98 (60%)/18/85 (21%) | Nausea any 40/98 (41%)/29/85 (34%); G3+ 1/98 (1%)/0/85 (0%); diarrhea any 19/98 (19%)/48/85 (56%) | Anemia any 27/98 (28%)/18/85 (21%); G3+ 8/98 (8%)/7/85 (8%); thrombocytopenia G3+ 11/98 (11%)/0/85 (0%) | Renal any NR/NR; G3+ NR; creatinine increased any NR | Cognitive disturbance G3+ NR; muscle weakness any NR; memory impairment any NR | NR |
| **Morris et al., 2024** | Any 224/227 (99%)/228/232 (98%); G3+ 80/227 (35%)/114/232 (49%) | Fatigue any 54/227 (23.8%)/59/232 (25.4%); G3+ 1/227 (0.4%)/4/232 (1.7%); dry mouth any 135/227 (59.5%)/6/232 (2.6%) | Nausea any 74/227 (32.6%)/29/232 (12.5%); G3+ 0/227 (0%)/1/232 (0.4%); diarrhea any 38/227 (16.7%)/23/232 (9.9%) | Anemia any 62/227 (27.3%)/45/232 (19.4%); G3+ 14/227 (6.2%)/16/232 (6.9%); thrombocytopenia G3+ 5/227 (2.2%)/2/232 (0.9%) | Renal any 14/19/227/232; G3+ 2/8; creatinine increased any 10/7 | Cognitive disturbance G3+ NR; muscle weakness any NR; memory impairment any NR | NR |
| **SPLASH, 2024** | Any NR; G3+ NR | Fatigue any NR; G3+ NR; dry mouth any NR | Nausea any NR; G3+ NR; diarrhea any NR | Anemia any NR; G3+ NR; thrombocytopenia G3+ NR | Renal any NR/NR; G3+ NR; creatinine increased any NR | Cognitive disturbance G3+ NR; muscle weakness any NR; memory impairment any NR | NR |
| **Emmett et al., 2024** | Any NR; G3+ 37/81 (46%)/35/79 (44%) | Fatigue any 62/81 (77%)/55/79 (70%); G3+ 2/81 (2%)/2/79 (3%); dry mouth any 33/81 (41%)/8/79 (10%) | Nausea any 39/81 (48%)/24/79 (30%); G3+ 0/81 (0%)/0/79 (0%); diarrhea any NR | Anemia any 12/81 (15%)/4/79 (5%); G3+ 3/81 (4%)/0/79 (0%); thrombocytopenia G3+ 1/81 (1%) | Renal any NR/NR; G3+ NR; creatinine increased any NR | Cognitive disturbance G3+ 1/0; muscle weakness any 2/2; memory impairment any 5/5 | NR |
| **Satapathy et al., 2022** | Any NR; G3+ 6/20 (30%)/10/20 (50%) | Fatigue any 9/20 (45%)/7/20 (35%); G3+ 0/20 (0%)/0/20 (0%); dry mouth any 12/20 (60%)/0/20 (0%) | Nausea any 4/20 (20%; nausea/vomiting)/7/20 (35%; nausea/vomiting) | Anemia any 14/20 (70%)/15/20 (75%); G3+ 5/20 (25%)/4/20 (20%); thrombocytopenia G3+ 2/20 (10%)/1/20 (5%) | Renal any 1/4/20/20; G3+ 0/1; creatinine increased any NR | Cognitive disturbance G3+ NR; muscle weakness any NR; memory impairment any NR | NR |
| **Chi et al., 2025** | Any NR; G3+ 13% treatment-related grade 3/4 AEs/34% treatment-related grade 3/4 AEs | Fatigue any NR; G3+ NR; dry mouth any NR | Nausea any NR; G3+ NR; diarrhea any NR | Anemia any NR; G3+ NR; thrombocytopenia G3+ NR | Renal any NR/NR; G3+ NR; creatinine increased any NR | Cognitive disturbance G3+ NR; muscle weakness any NR; memory impairment any NR | 2 docetaxel treatment-related deaths |
| **Azad et al., 2024** | Any NR; G3+ 18/63 (29% | Fatigue any 37/63 (59%)/35/63 (56%); G3+ 2/63 (3%)/0/63 (0%); dry mouth any 23/63 (37%)/0/63 (0%) | Nausea any 15/63 (24%)/15/63 (24%); G3+ 0/63 (0%)/0/63 (0%); diarrhea any 14/63 (22%)/16/63 (25%) | Anemia any 6/63 (10%)/1/63 (2%); G3+ 2/63 (3%)/0/63 (0%); thrombocytopenia G3+ 0/63 (0%)/0/63 (0%) | Renal any NR/NR; G3+ NR; creatinine increased any NR | Cognitive disturbance G3+ NR; muscle weakness any NR; memory impairment any NR | NR |
| **Satapathy et al., 2025** | Any 10/15 (67%)/8/15 (53%); G3+ 0/15 (0%)/0/15 (0%) | Fatigue any 4/15 (27%)/0/15 (0%); G3+ 0/15 (0%)/0/15 (0%); dry mouth any 2/15 (13%)/0/15 (0%) | Nausea any NR; G3+ NR; diarrhea any NR | Anemia any 7/15 (47%)/5/15 (33%); G3+ 0/15 (0%)/0/15 (0%); thrombocytopenia G3+ 0/15 (0%)/0/15 (0%) | Renal any 1/0/15/15; G3+ 0/0; creatinine increased any 1/0 | Cognitive disturbance G3+ NR; muscle weakness any NR; memory impairment any NR | NR |
| **Tagawa et al., 2025** | Any 555/564 (98.4%)/546/565 (96.6%); G3+ 286/564 (50.7%)/243/565 (43.0%) | Fatigue any 196/564 (34.8%)/158/565 (28.0%); G3+ 6/564 (1.1%)/6/565 (1.1%); dry mouth any 258/564 (45.7%)/21/565 (3.7%) | Nausea any 193/564 (34.2%)/53/565 (9.4%); G3+ 1/564 (0.2%)/0/565 (0%); diarrhea any NR | Anemia any 153/564 (27.1%)/75/565 (13.3%); G3+ 28/564 (5.0%)/15/565 (2.7%); thrombocytopenia G3+ 10/564 (1.8%)/3/565 (0.5%) | Renal any 40/26/564/565; G3+ 9/5; creatinine increased any NR | Cognitive disturbance G3+ NR; muscle weakness any NR; memory impairment any NR | NR |
| **Prive et al., 2026** | Any NR; G3+ 4/29 (14%) | Fatigue any 17/29 (59%; G3+ 0/29 (0%)/0/29 (0%); dry mouth any 22/29 (76%)/3/29 (10%) | Nausea any 17/29 (59%; G3+ 0/29 (0%)/0/29 (0%); diarrhea any 4/29 (14%)/3/29 (10%) | Anemia any 7/29 (24%)/7/29 (24%; G3+ 0/29 (0%)/0/29 (0%); thrombocytopenia G3+ 0/29 (0%)/0/29 (0%) | Renal any NR/NR; G3+ NR; creatinine increased any NR | Cognitive disturbance G3+ NR; muscle weakness any NR; memory impairment any NR | NR |
| **Kishan et al., 2025** | Any NR; G3+ 3/45 (6.7%; only grade 3 lymphopenia)/2/42 (4.8% | Fatigue any 29 events reported (grade 1:27; G3+ NR; dry mouth any 3/45 (6.8% | Nausea any NR; G3+ NR; diarrhea any 5/45 (11.1% | Anemia any 14/45 (31.1%; G3+ 0/45 (0%)/0/42 (0%); thrombocytopenia G3+ 0/45 (0%)/0/42 (0%) | Renal any 0/1/45/42; G3+ 0/0; creatinine increased any NR | Cognitive disturbance G3+ NR; muscle weakness any NR; memory impairment any NR | NR |

AE, adverse event; G3+, grade 3 or higher; TRAE, treatment-related adverse event.

**eTable 9.** Summary of analysis-ready effect-size dataset used for forest plots

| **Clinical subgroup** | **Included trials** | **Primary progression evidence** | **Supportive endpoints retained** | **Reviewer-facing note** |
| --- | --- | --- | --- | --- |
| **Established late-line mCRPC** | VISION; TheraP | PFS/rPFS HRs 0.40 and 0.64; pooled subgroup estimate shown in eTable 11. | OS, PSA50, ORR, grade >=3 AE, pain/QoL. | Full row-level extraction retained outside the Word supplement. |
| **Taxane-naive mCRPC after ARPI** | PSMAfore; SPLASH | rPFS HRs 0.49 and 0.71. | OS, PSA50, ORR, grade >=3 AE, QoL/pain. | SPLASH remains conference/company-source evidence. |
| **First-line/high-risk mCRPC combination** | ENZA-p | PFS/PSA-PFS signal favored RLT; rPFS estimate also summarized in eTable 6. | OS, PSA response, pain response, grade >=3 AE. | Single-study subgroup; avoid overinterpretation. |
| **Chemotherapy-naive mCRPC vs docetaxel** | CCTG PR.21/PLUDO; Satapathy mCRPC | No clear PFS/rPFS advantage versus docetaxel. | OS, PSA50, ORR, grade >=3 AE. | Active comparator subgroup; interpreted separately. |
| **mHSPC upfront/intensification** | UpFrontPSMA; CONSOLIDATE; PSMAddition | PFS/rPFS estimates favored RLT-based intensification overall. | OS, PSA response, ORR, grade >=3 AE. | Includes one phase 3 conference presentation. |
| **Oligometastatic/oligorecurrent HSPC** | BULLSEYE; LUNAR | PFS favored PSMA-RLT strategies but heterogeneity was substantial. | PSA50 and safety endpoints. | Exploratory subgroup; small trials only. |

This table provides a concise reviewer-facing summary of the model-ready dataset; complete row-level extraction is retained in the analysis workbook.

NR indicates not reported. Paired values are RLT/control unless otherwise indicated.

**eTable 10.** RoB 2.0 judgments for supportive endpoints by randomized trial

Outcome-specific assessment for OS, response endpoints, and grade ≥3 adverse events; PFS/rPFS assessed separately

| **RCT** | **Endpoint** | **D1** | **D2** | **D3** | **D4** | **D5** | **Overall** | **Reason for judgment** |
| --- | --- | --- | --- | --- | --- | --- | --- | --- |
| **VISION** | OS | Low | Some concerns | Low | Low | Low | Some concerns | Objective endpoint; open-label care/subsequent therapy may affect interpretation. |
| **VISION** | Response (PSA50/ORR) | Low | Some concerns | Low | Some concerns | Low | Some concerns | Published response data; ORR limited to measurable-dz subsets. |
| **VISION** | Safety (grade ≥3 AE) | Low | Some concerns | Low | Some concerns | Low | Some concerns | Published safety data; open-label AE ascertainment/attribution. |
| **TheraP** | OS | Low | Some concerns | Low | Low | Low | Some concerns | Objective endpoint; open-label care/subsequent therapy may affect interpretation. |
| **TheraP** | Response (PSA50/ORR) | Low | Some concerns | Low | Some concerns | Low | Some concerns | Published response data; ORR limited to measurable-dz subsets. |
| **TheraP** | Safety (grade ≥3 AE) | Low | Some concerns | Low | Some concerns | Low | Some concerns | Published safety data; open-label AE ascertainment/attribution. |
| **PSMAfore** | OS | Low | Some concerns | Some concerns | Low | Some concerns | Some concerns | Immature/preliminary OS; crossover/subsequent therapy limits inference. |
| **PSMAfore** | Response (PSA50/ORR) | Low | Some concerns | Low | Some concerns | Low | Some concerns | Published response data; ORR limited to measurable-dz subsets. |
| **PSMAfore** | Safety (grade ≥3 AE) | Low | Some concerns | Low | Some concerns | Low | Some concerns | Published safety data; open-label AE ascertainment/attribution. |
| **SPLASH** | OS | Low | Some concerns | Some concerns | Low | Some concerns | Some concerns | Immature/preliminary OS; crossover/subsequent therapy limits inference. |
| **SPLASH** | Response (PSA50/ORR) | Low | Some concerns | Some concerns | Some concerns | Some concerns | Some concerns | Preliminary/incomplete public response data. |
| **SPLASH** | Safety (grade ≥3 AE) | Low | Some concerns | Some concerns | Some concerns | Some concerns | Some concerns | Preliminary safety data; limited AE granularity/attribution. |
| **ENZA-p** | OS | Low | Some concerns | Low | Low | Low | Some concerns | Published RCT; OS supportive due to open-label sequencing/event maturity. |
| **ENZA-p** | Response (PSA50/ORR) | Low | Some concerns | Low | Some concerns | Low | Some concerns | Published response data; ORR limited to measurable-dz subsets. |
| **ENZA-p** | Safety (grade ≥3 AE) | Low | Some concerns | Low | Some concerns | Low | Some concerns | Published safety data; open-label AE ascertainment/attribution. |
| **PR21/PLUDO** | OS | Some concerns | Some concerns | Some concerns | Low | Some concerns | Some concerns | Conference-level OS with limited public detail. |
| **PR21/PLUDO** | Response (PSA50/ORR) | Some concerns | Some concerns | Some concerns | Some concerns | Some concerns | Some concerns | Preliminary/incomplete public response data. |
| **PR21/PLUDO** | Safety (grade ≥3 AE) | Some concerns | Some concerns | Some concerns | Some concerns | Some concerns | Some concerns | Preliminary safety data; limited AE granularity/attribution. |
| **Satapathy** | OS | Some concerns | Some concerns | Some concerns | Low | Some concerns | Some concerns | Small/recent RCT; limited mature OS data. |
| **Satapathy** | Response (PSA50/ORR) | Some concerns | Some concerns | Some concerns | Some concerns | Some concerns | Some concerns | Small/subset-based response assessment. |
| **Satapathy** | Safety (grade ≥3 AE) | Some concerns | Some concerns | Some concerns | Some concerns | Some concerns | Some concerns | Small trial; limited AE-window/attribution detail. |
| **CONSOLIDATE** | OS | Some concerns | Some concerns | Some concerns | Low | Some concerns | Some concerns | Small/recent RCT; limited mature OS data. |
| **CONSOLIDATE** | Response (PSA50/ORR) | Some concerns | Some concerns | Some concerns | Some concerns | Some concerns | Some concerns | Small/subset-based response assessment. |
| **CONSOLIDATE** | Safety (grade ≥3 AE) | Some concerns | Some concerns | Some concerns | Some concerns | Some concerns | Some concerns | Small trial; limited AE-window/attribution detail. |
| **PSMAddition** | OS | Low | Some concerns | Some concerns | Low | Some concerns | Some concerns | Immature/preliminary OS; crossover/subsequent therapy limits inference. |
| **PSMAddition** | Response (PSA50/ORR) | Low | Some concerns | Some concerns | Some concerns | Some concerns | Some concerns | Preliminary/incomplete public response data. |
| **PSMAddition** | Safety (grade ≥3 AE) | Low | Some concerns | Some concerns | Some concerns | Some concerns | Some concerns | Preliminary safety data; limited AE granularity/attribution. |
| **UpFrontPSMA** | OS | Low | Some concerns | Low | Low | Low | Some concerns | Published RCT; OS supportive due to open-label sequencing/event maturity. |
| **UpFrontPSMA** | Response (PSA50/ORR) | Low | Some concerns | Low | Some concerns | Low | Some concerns | Published response data; ORR limited to measurable-dz subsets. |
| **UpFrontPSMA** | Safety (grade ≥3 AE) | Low | Some concerns | Low | Some concerns | Low | Some concerns | Published safety data; open-label AE ascertainment/attribution. |
| **BULLSEYE** | OS | Some concerns | Some concerns | Some concerns | Low | Some concerns | Some concerns | Small/recent RCT; limited mature OS data. |
| **BULLSEYE** | Response (PSA50/ORR) | Some concerns | Some concerns | Some concerns | Some concerns | Some concerns | Some concerns | Small/subset-based response assessment. |
| **BULLSEYE** | Safety (grade ≥3 AE) | Some concerns | Some concerns | Some concerns | Some concerns | Some concerns | Some concerns | Small trial; limited AE-window/attribution detail. |
| **LUNAR** | OS | Some concerns | Some concerns | Some concerns | Low | Some concerns | Some concerns | Small/recent RCT; limited mature OS data. |
| **LUNAR** | Response (PSA50/ORR) | Some concerns | Some concerns | Some concerns | Some concerns | Some concerns | Some concerns | Small/subset-based response assessment. |
| **LUNAR** | Safety (grade ≥3 AE) | Some concerns | Some concerns | Some concerns | Some concerns | Some concerns | Some concerns | Small trial; limited AE-window/attribution detail. |

**Notes:** Judgments follow the Cochrane RoB 2.0 domain structure and are outcome-specific. D1, bias arising from randomization; D2, deviations from intended interventions; D3, missing outcome data; D4, outcome measurement; D5, selective reporting. PFS/rPFS was evaluated separately as the primary progression endpoint. Supportive-endpoint judgments emphasize OS maturity, crossover/subsequent therapy, response subset restrictions, and AE reporting granularity. No high-risk judgment was assigned because available information did not indicate a clear domain-level high risk.

**Abbreviations:** AE, adverse event; ORR, objective response rate; OS, overall survival; PFS, progression-free survival; PSA50, prostate-specific antigen decline of at least 50%; RCT, randomized clinical trial; RoB 2.0, Cochrane risk-of-bias tool for randomized trials; rPFS, radiographic progression-free survival.

**eTable 11.** Subgroup-stratified sensitivity analysis summary

PFS/rPFS robustness checks performed within each prespecified clinical subgroup

| **Clinical subgroup** | **Sensitivity set** | **Included trials** | **k** | **Pooled PFS/rPFS HR (95% CI)** | **I²** | **Interpretation** |
| --- | --- | --- | --- | --- | --- | --- |
| **Late-line mCRPC (post-ARPI and post-taxane)** | Main subgroup estimate | TheraP; VISION | 2 | 0.51 (0.32-0.80) | 74.2% | favorable progression signal retained. |
|  | Full-publication only | TheraP; VISION | 2 | 0.51 (0.32-0.80) | 74.2% | Result unchanged after restriction to full publications. |
|  | Phase III only | VISION | 1 | 0.40 (0.29-0.56) | — | Single-study phase III estimate; favorable signal retained. |
|  | 177Lu-PSMA-617 only | TheraP; VISION | 2 | 0.51 (0.32-0.80) | 74.2% | Result unchanged after ligand restriction. |
| **Taxane-naive mCRPC after ARPI** | Main subgroup estimate | PSMAfore; SPLASH | 2 | 0.59 (0.41-0.84) | 78.0% | favorable progression signal retained. |
|  | Full-publication only | PSMAfore | 1 | 0.49 (0.39-0.61) | — | Signal persisted after excluding SPLASH conference/company data. |
|  | Phase III only | PSMAfore; SPLASH | 2 | 0.59 (0.41-0.84) | 78.0% | Phase III-only estimate remained favorable. |
|  | 177Lu-PSMA-617 only | PSMAfore | 1 | 0.49 (0.39-0.61) | — | Signal persisted after excluding non-PSMA-617 ligand data. |
| **First-line/high-risk mCRPC combination** | Main subgroup estimate | ENZA-p | 1 | 0.43 (0.29-0.63) | — | Single-study estimate; favorable signal retained. |
|  | Full-publication only | ENZA-p | 1 | 0.43 (0.29-0.63) | — | Single-study full-publication estimate; favorable signal retained. |
|  | Phase III only | No eligible trial | 0 | Not estimable | — | No phase III trial available within this subgroup. |
|  | 177Lu-PSMA-617 only | ENZA-p | 1 | 0.43 (0.29-0.63) | — | Single-study PSMA-617 estimate; favorable signal retained. |
| **Chemotherapy-naive mCRPC vs docetaxel** | Main subgroup estimate | CCTG PR.21/PLUDO; Satapathy mCRPC | 2 | 1.00 (0.77-1.30) | 0.0% | No robust favorable progression signal versus docetaxel. |
|  | Full-publication only | Satapathy mCRPC | 1 | 0.90 (0.46-1.77) | — | Single-study estimate was imprecise and crossed unity. |
|  | Phase III only | No eligible trial | 0 | Not estimable | — | No phase III trial available within this subgroup. |
|  | 177Lu-PSMA-617 only | CCTG PR.21/PLUDO; Satapathy mCRPC | 2 | 1.00 (0.77-1.30) | 0.0% | No robust favorable progression signal after ligand restriction. |
| **mHSPC upfront/intensification** | Main subgroup estimate | CONSOLIDATE; PSMAddition; UpFrontPSMA | 3 | 0.69 (0.57-0.84) | 0.0% | favorable progression signal retained. |
|  | Full-publication only | CONSOLIDATE; UpFrontPSMA | 2 | 0.58 (0.37-0.89) | 0.0% | Signal persisted after excluding PSMAddition conference data. |
|  | Phase III only | PSMAddition | 1 | 0.72 (0.58-0.90) | — | Single phase III estimate; favorable signal retained. |
|  | 177Lu-PSMA-617 only | CONSOLIDATE; PSMAddition; UpFrontPSMA | 3 | 0.69 (0.57-0.84) | 0.0% | Result unchanged after ligand restriction. |
| **Oligometastatic/oligorecurrent HSPC** | Main subgroup estimate | BULLSEYE; LUNAR | 2 | 0.17 (0.03-0.85) | 90.5% | Favorable signal retained, but substantial heterogeneity limits robustness. |
|  | Full-publication only | BULLSEYE; LUNAR | 2 | 0.17 (0.03-0.85) | 90.5% | Full-publication estimate remained favorable but highly heterogeneous. |
|  | Phase III only | No eligible trial | 0 | Not estimable | — | No phase III trial available within this subgroup. |
|  | 177Lu-PSMA-617 only | BULLSEYE | 1 | 0.07 (0.03-0.17) | — | Single-study estimate; exploratory inference only. |

**Notes:** Random-effects inverse-variance models were used on log HRs. Sensitivity checks were conducted within each clinical subgroup, not by globally regrouping all trials. When k = 1, the estimate represents the single reported trial effect and I² is not applicable. When k = 0, the sensitivity set was not estimable in that subgroup. These analyses assess robustness of subgroup-specific PFS/rPFS estimates and should not be interpreted as randomized head-to-head comparisons.

**Abbreviations:** ARPI, androgen receptor pathway inhibitor; CI, confidence interval; HR, hazard ratio; HSPC, hormone-sensitive prostate cancer; I², inconsistency statistic; mCRPC, metastatic castration-resistant prostate cancer; PFS, progression-free survival; PSMA-RLT, prostate-specific membrane antigen radioligand therapy; rPFS, radiographic progression-free survival.

**eFigure 1. Post-chemo / late-line mCRPC forest plots**


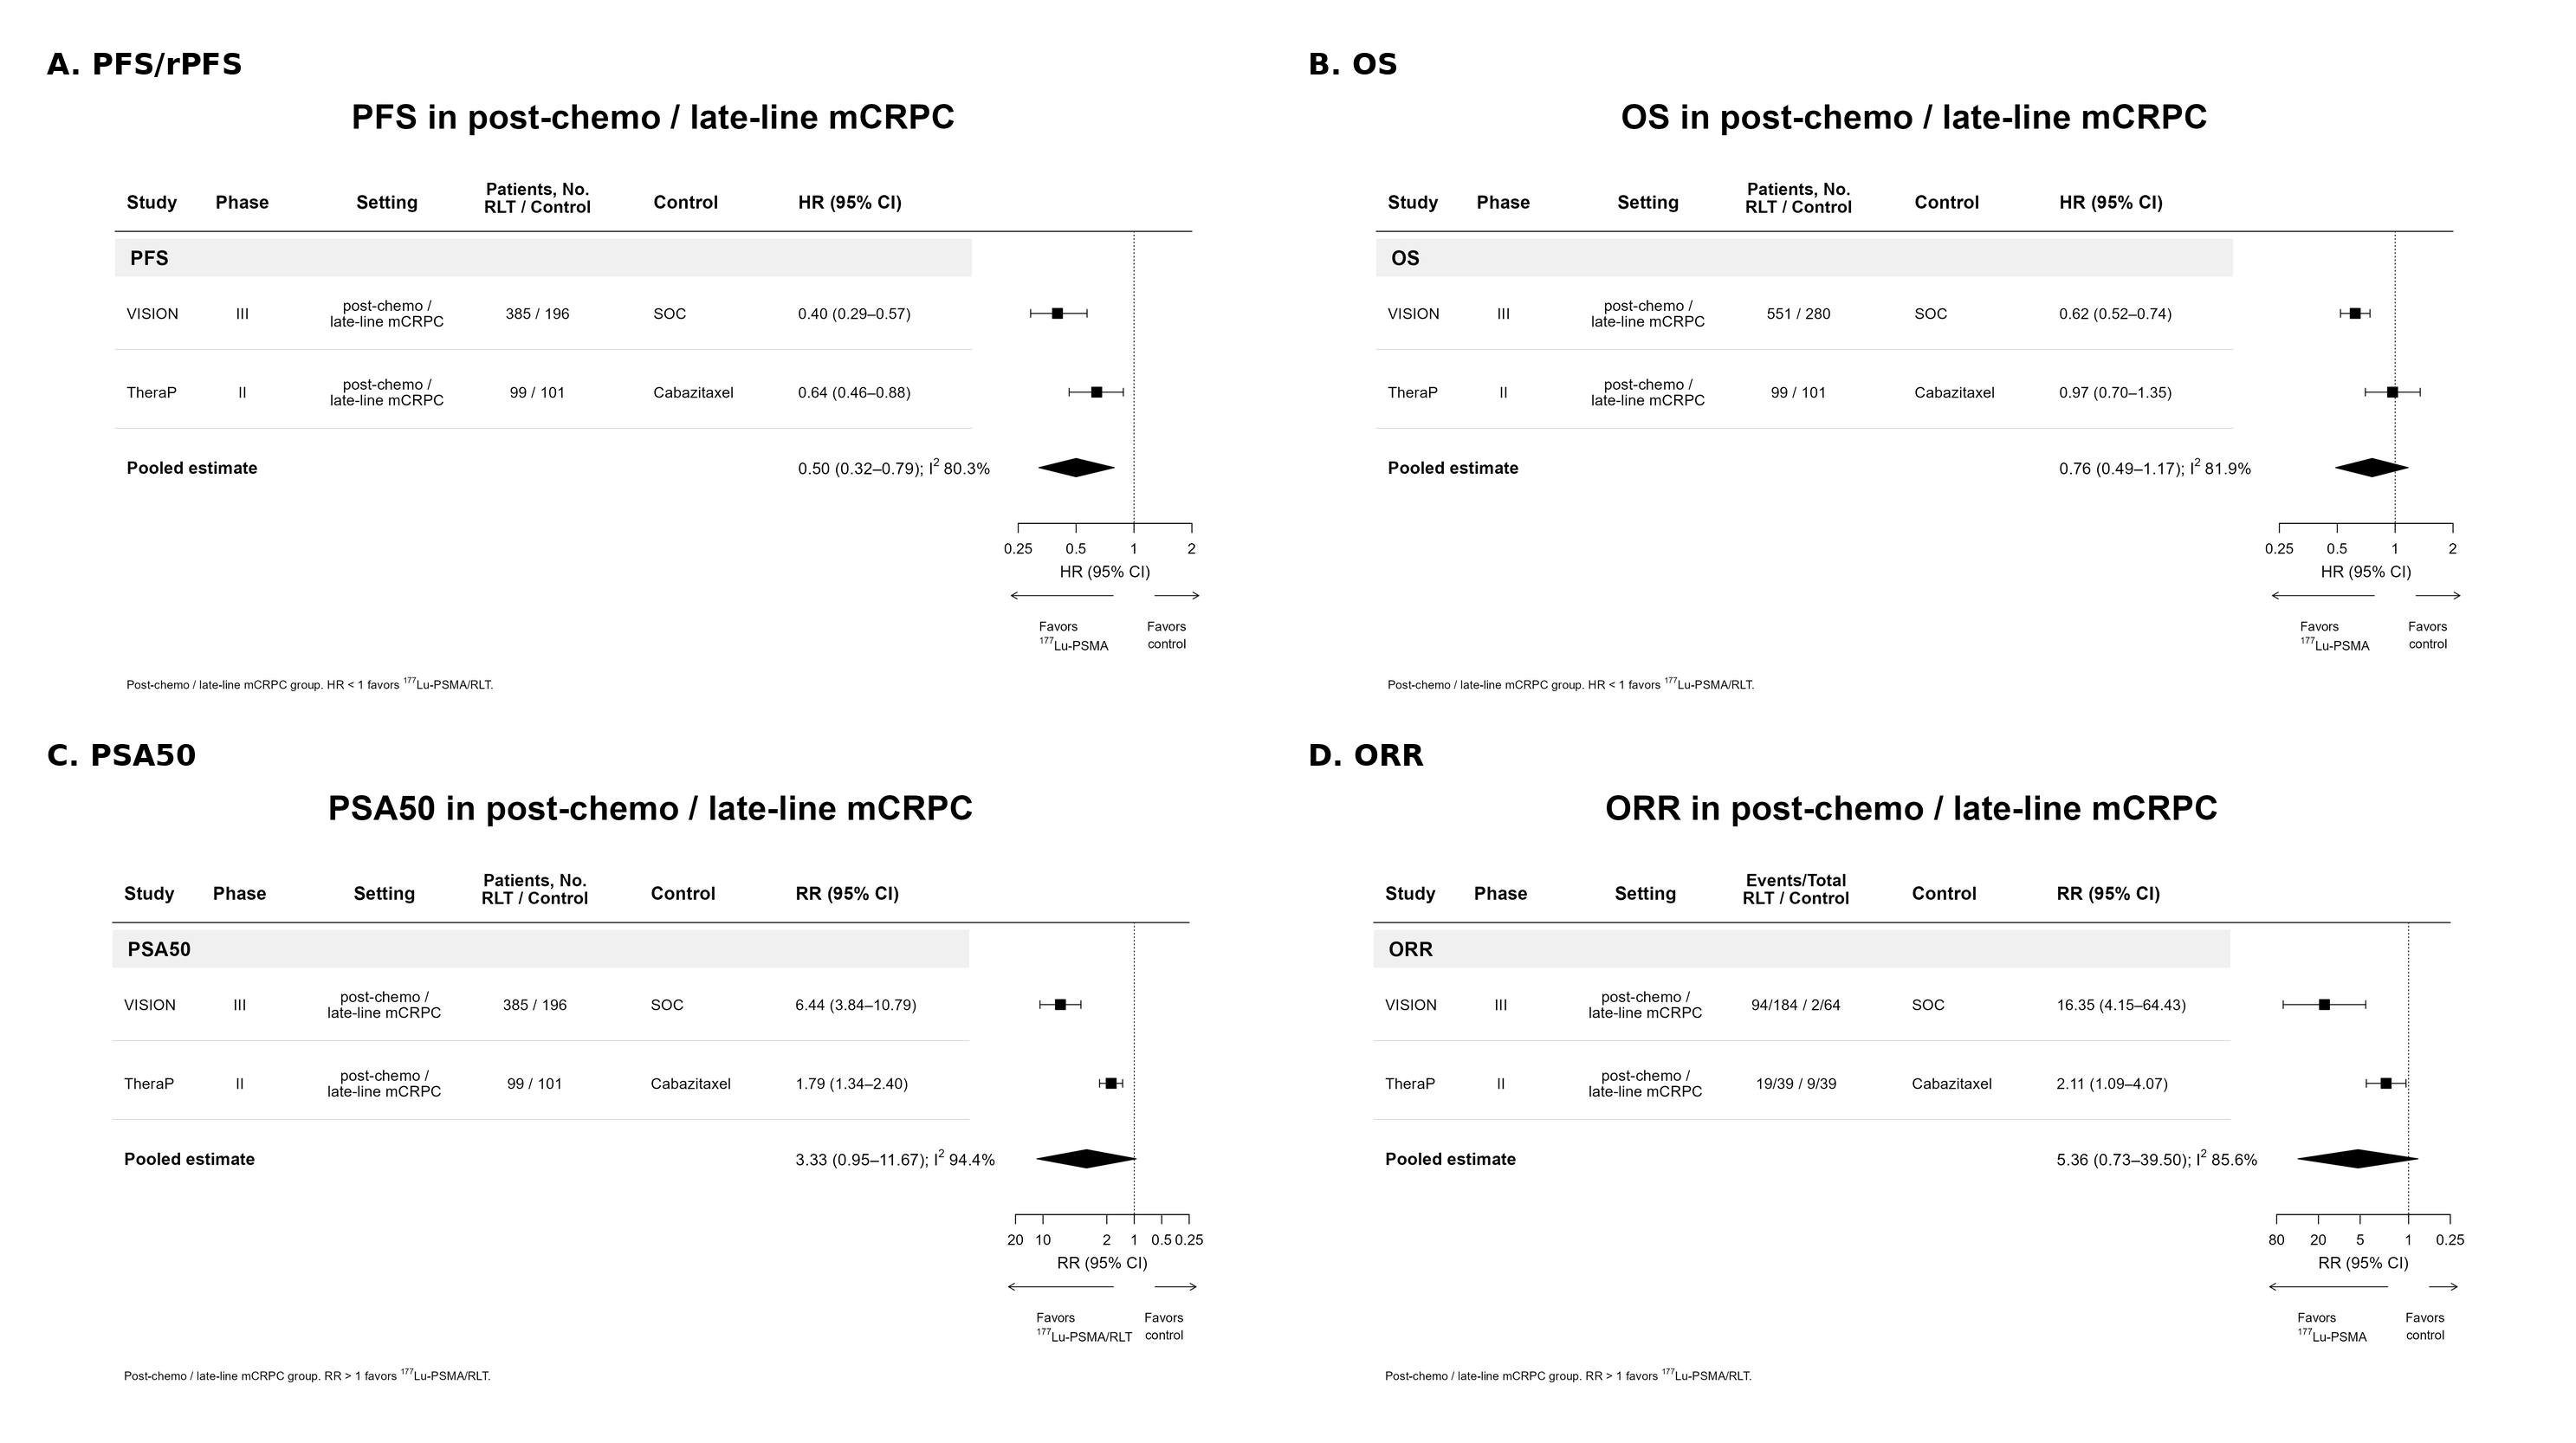


**eFigure 2. Taxane-naive mCRPC forest plots**


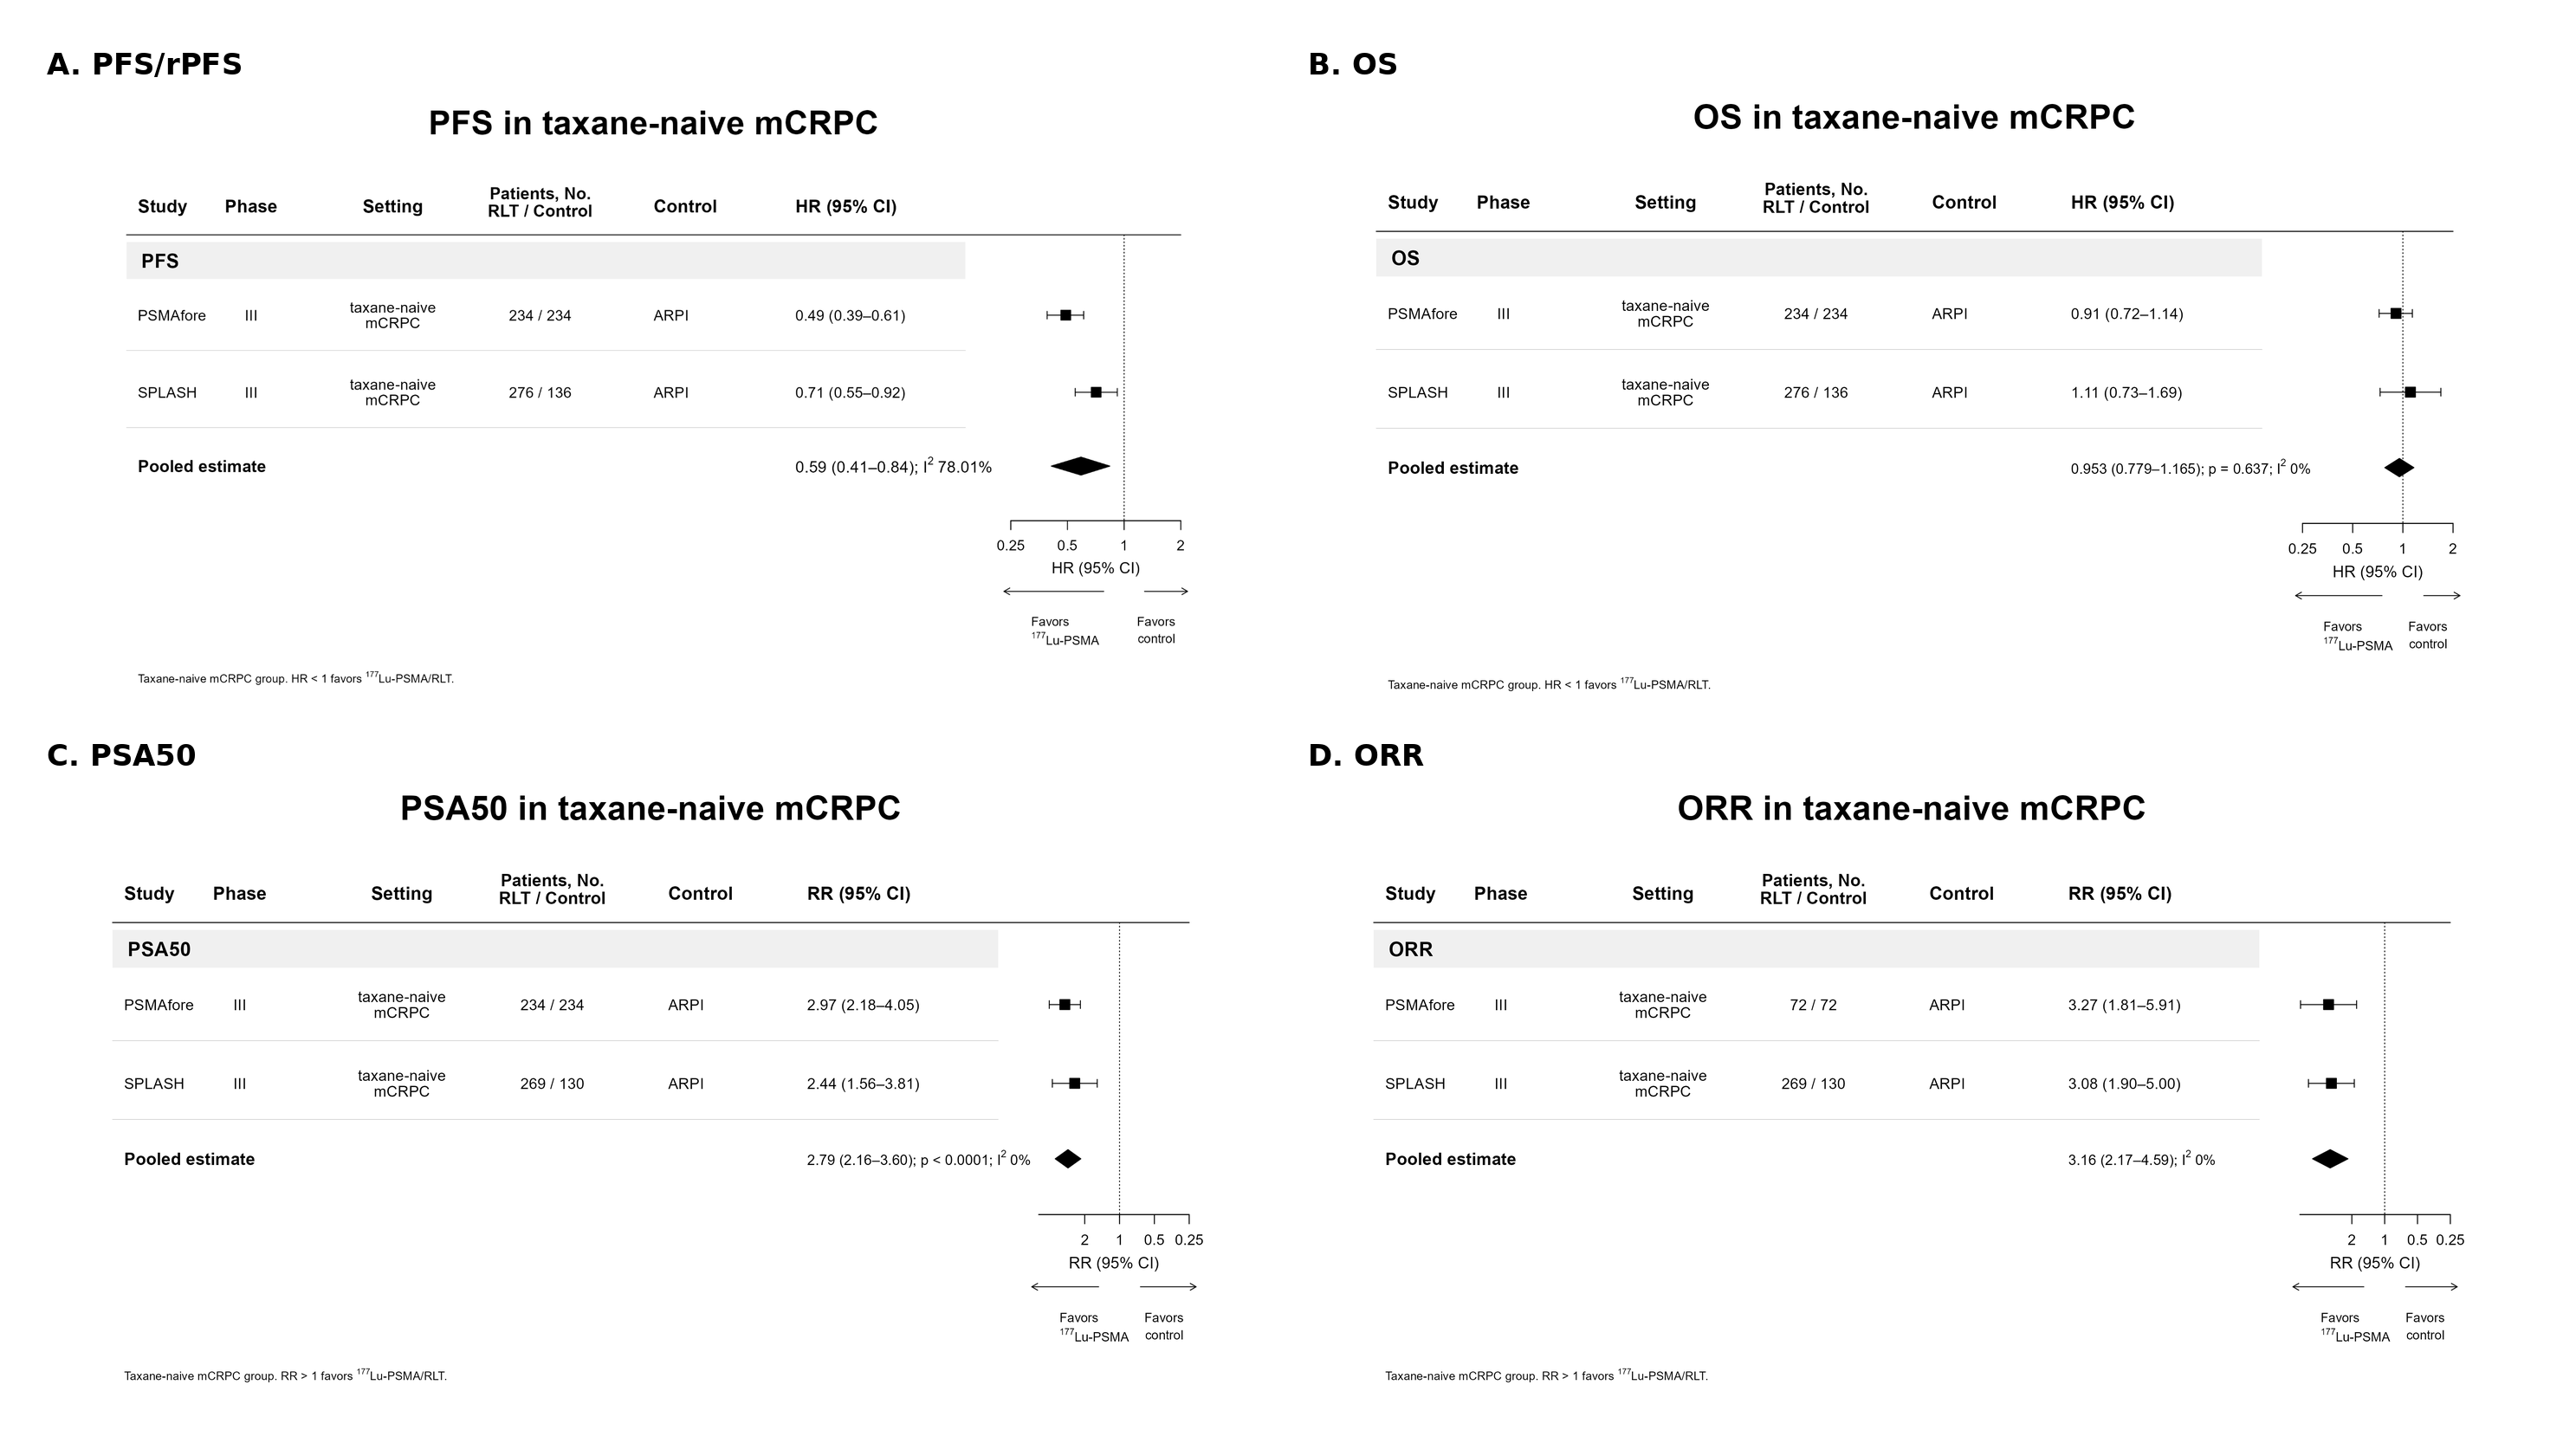


**eFigure 3. mHSPC upfront intensification forest plots**


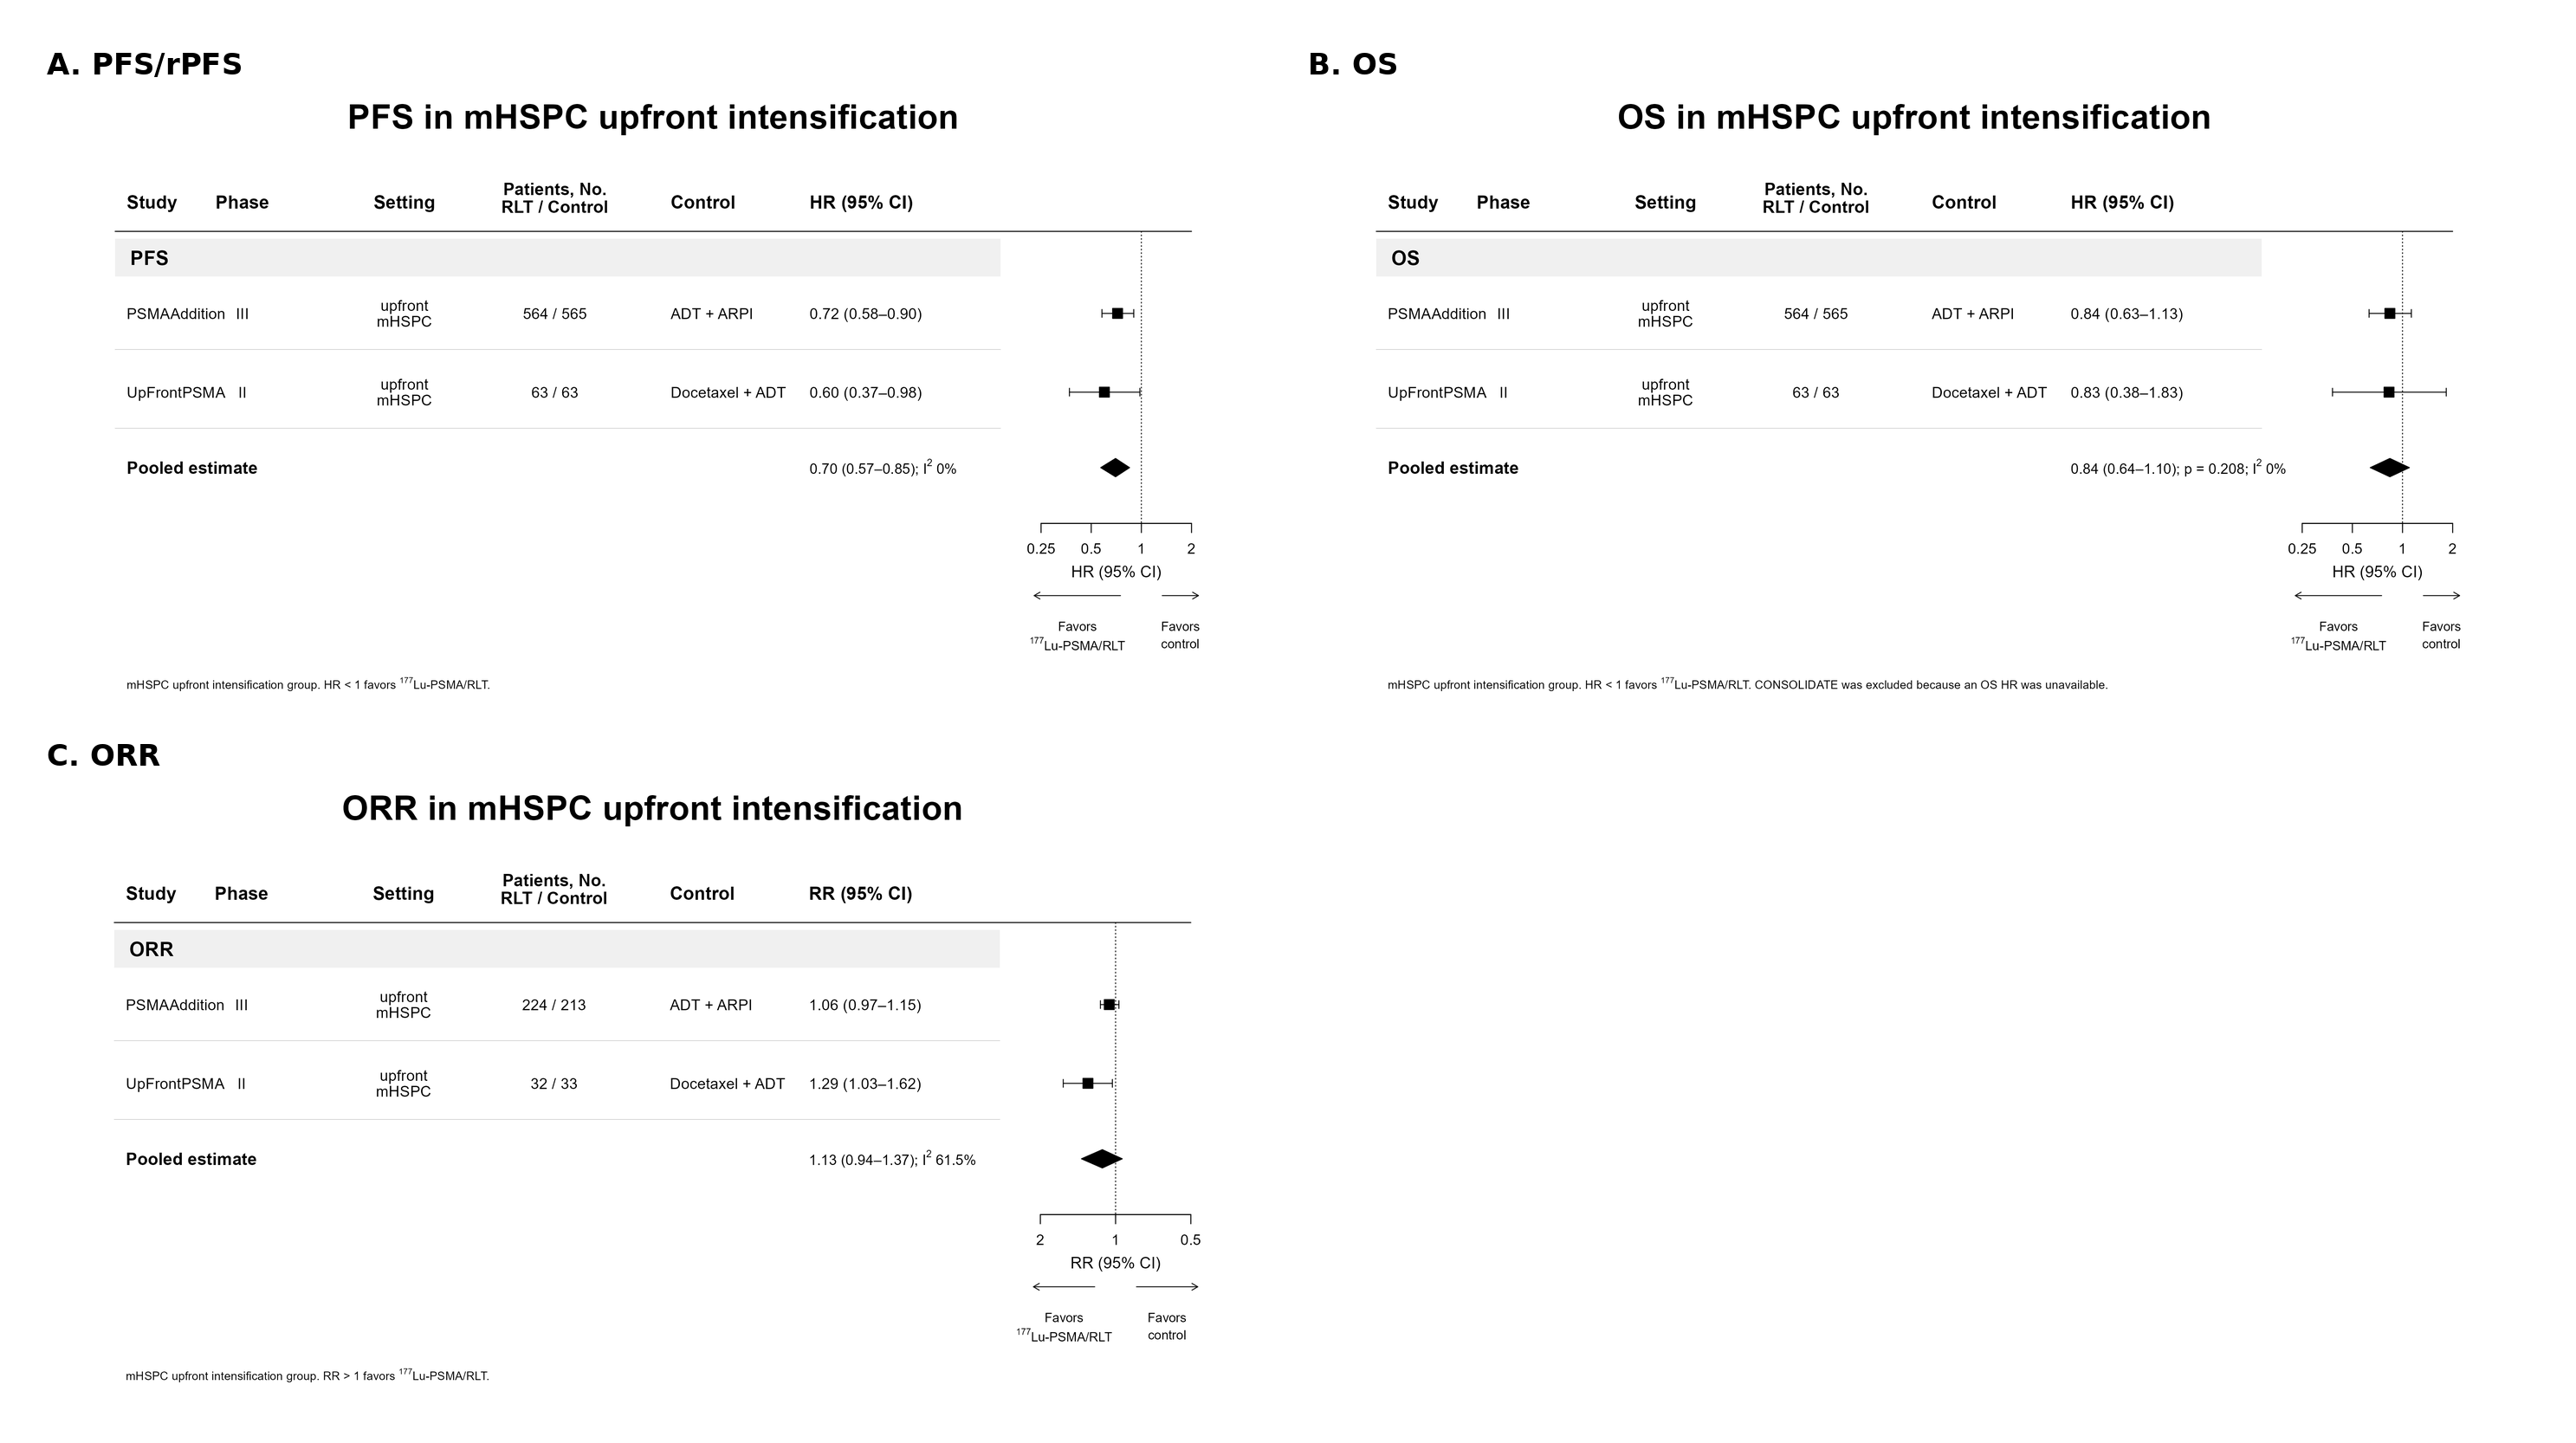


**eFigure 4. mHSPC sensitivity-analysis forest plots**


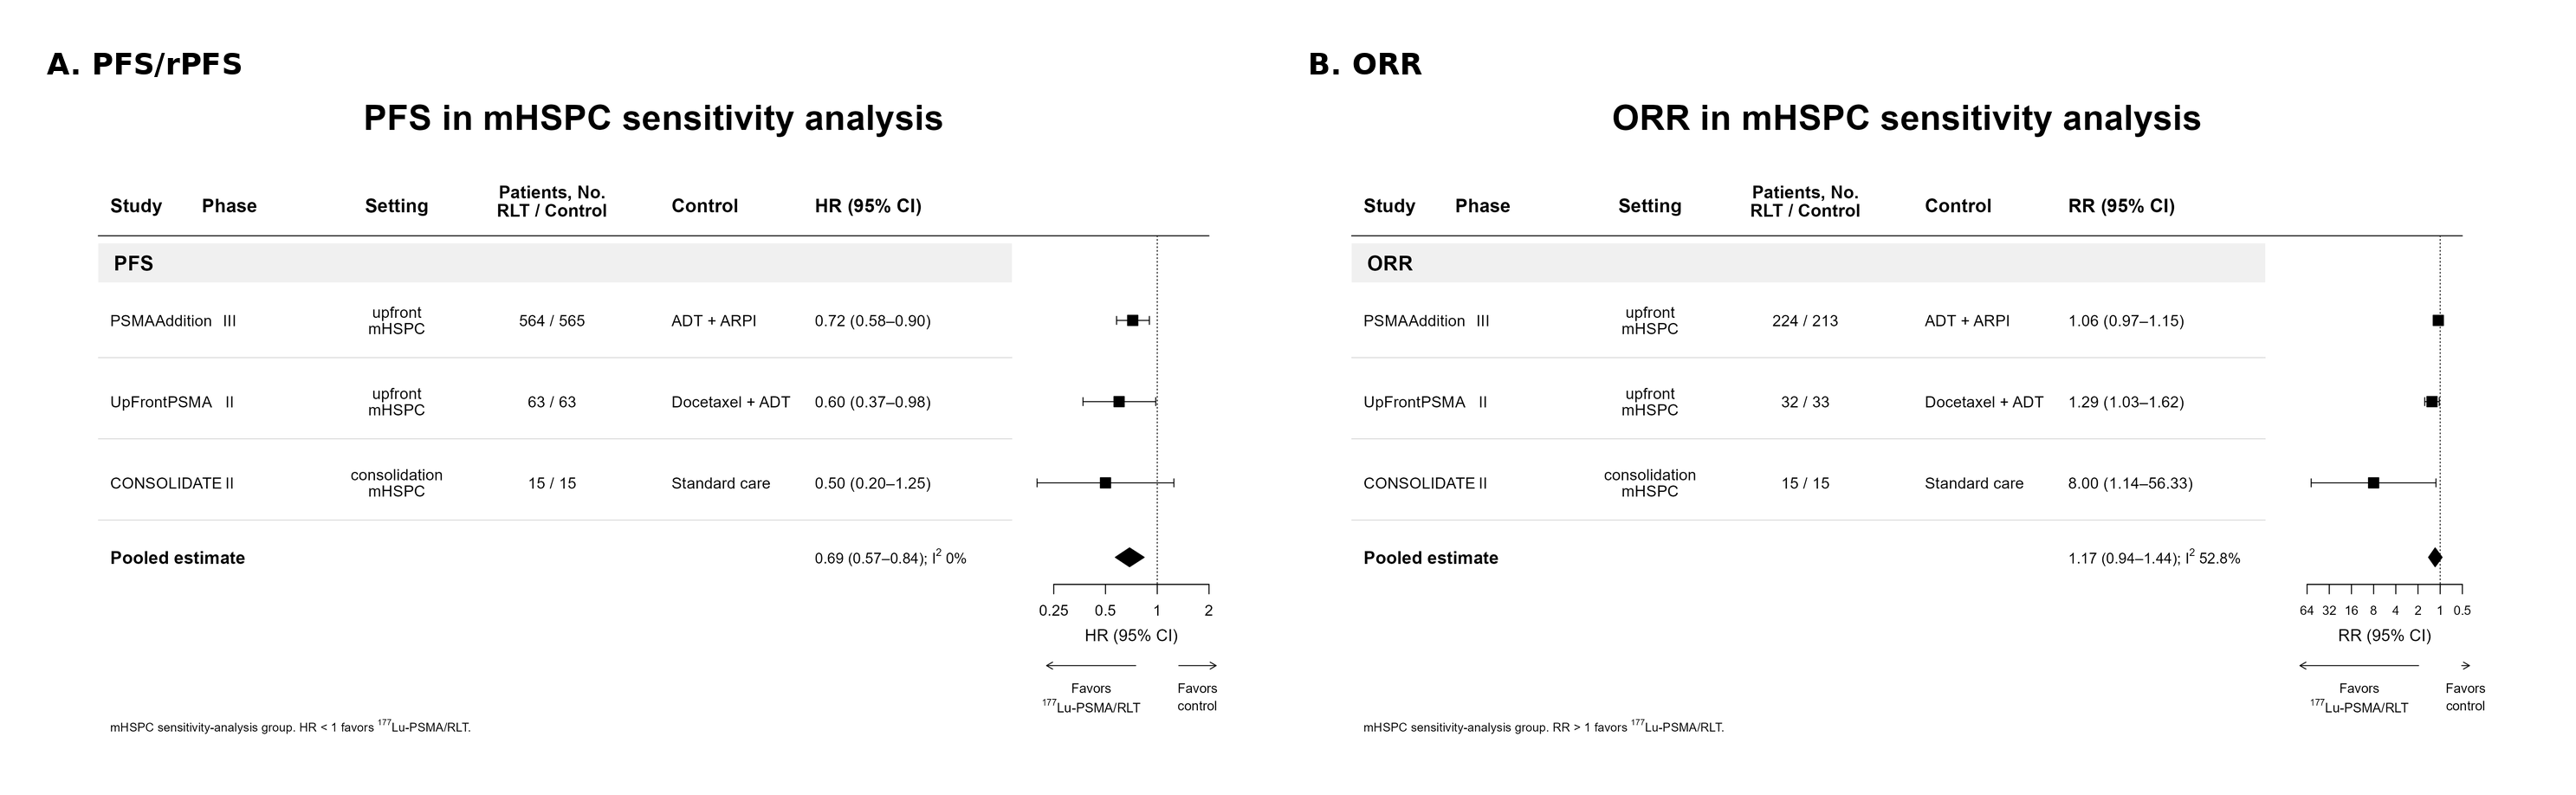


**eFigure 5. Oligometastatic/oligorecurrent HSPC forest plots**


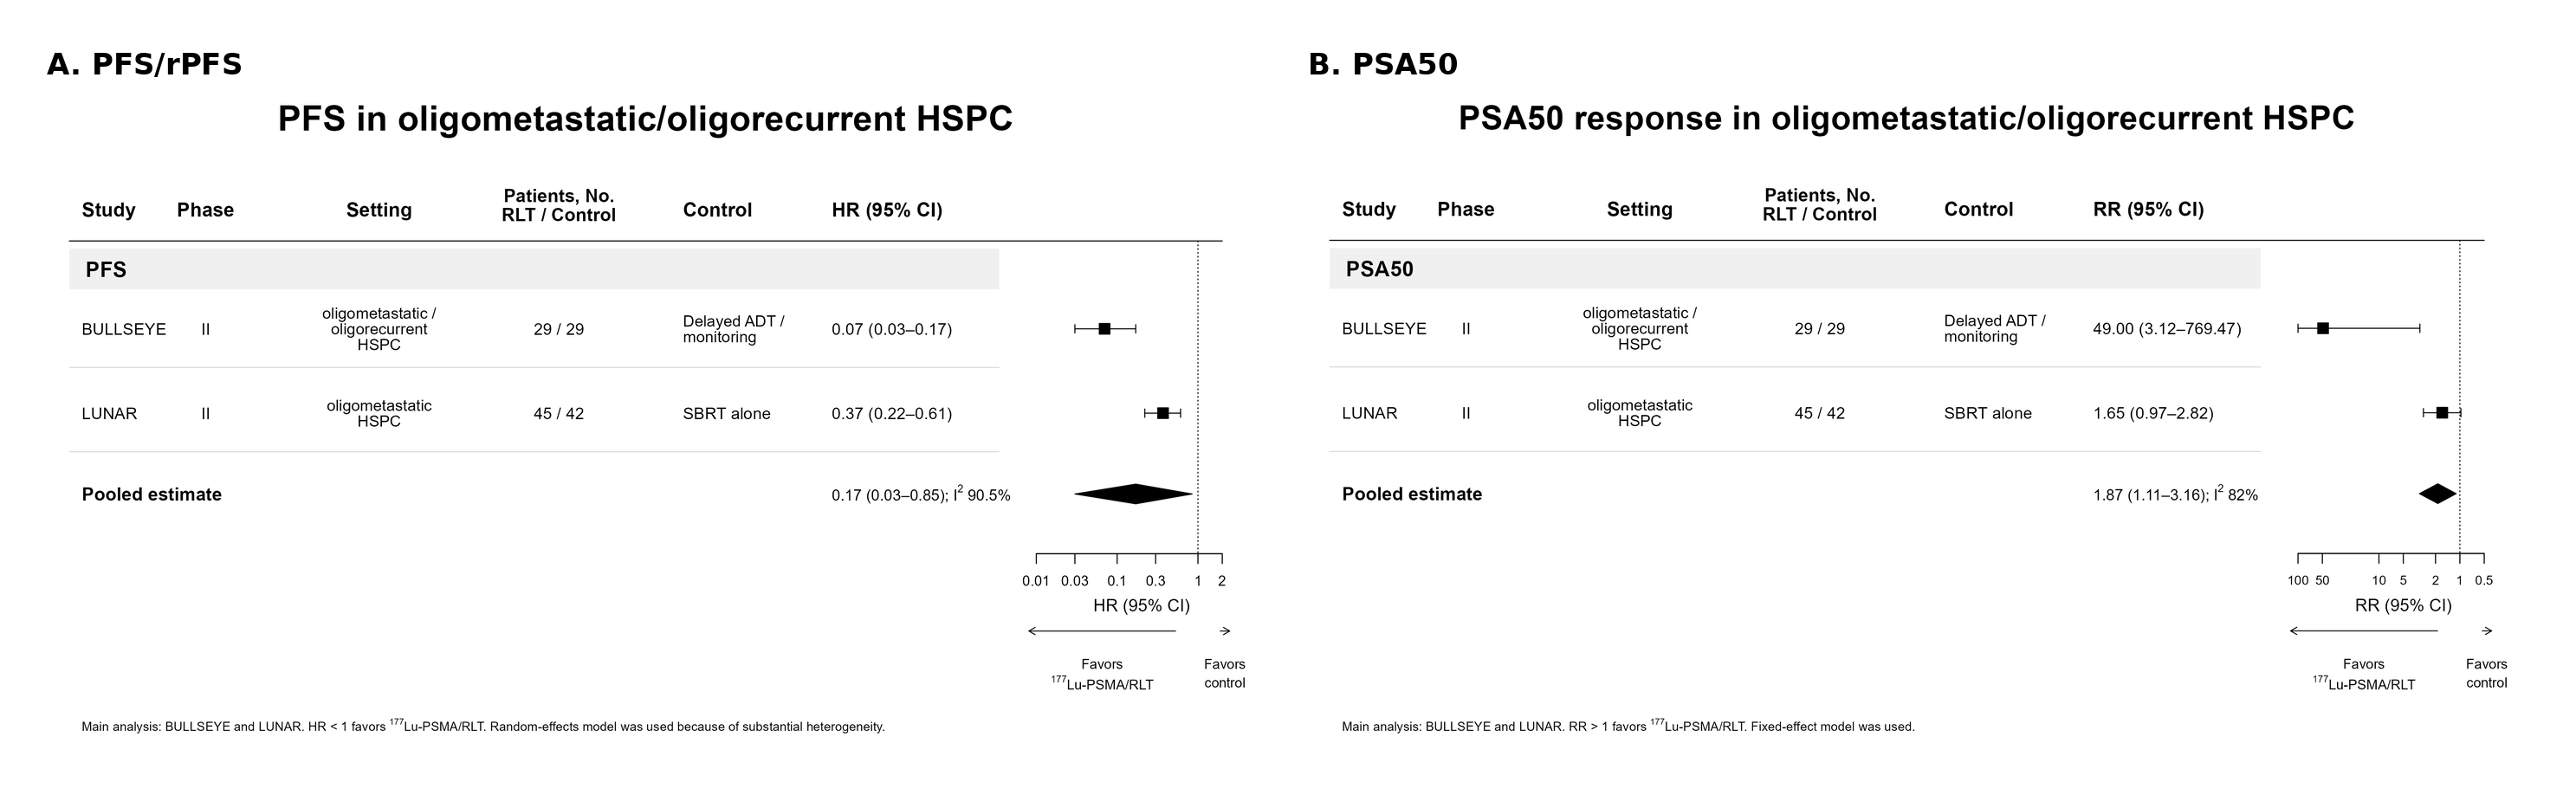


**eFigure 6. Docetaxel-comparator chemotherapy-naive mCRPC forest plots**


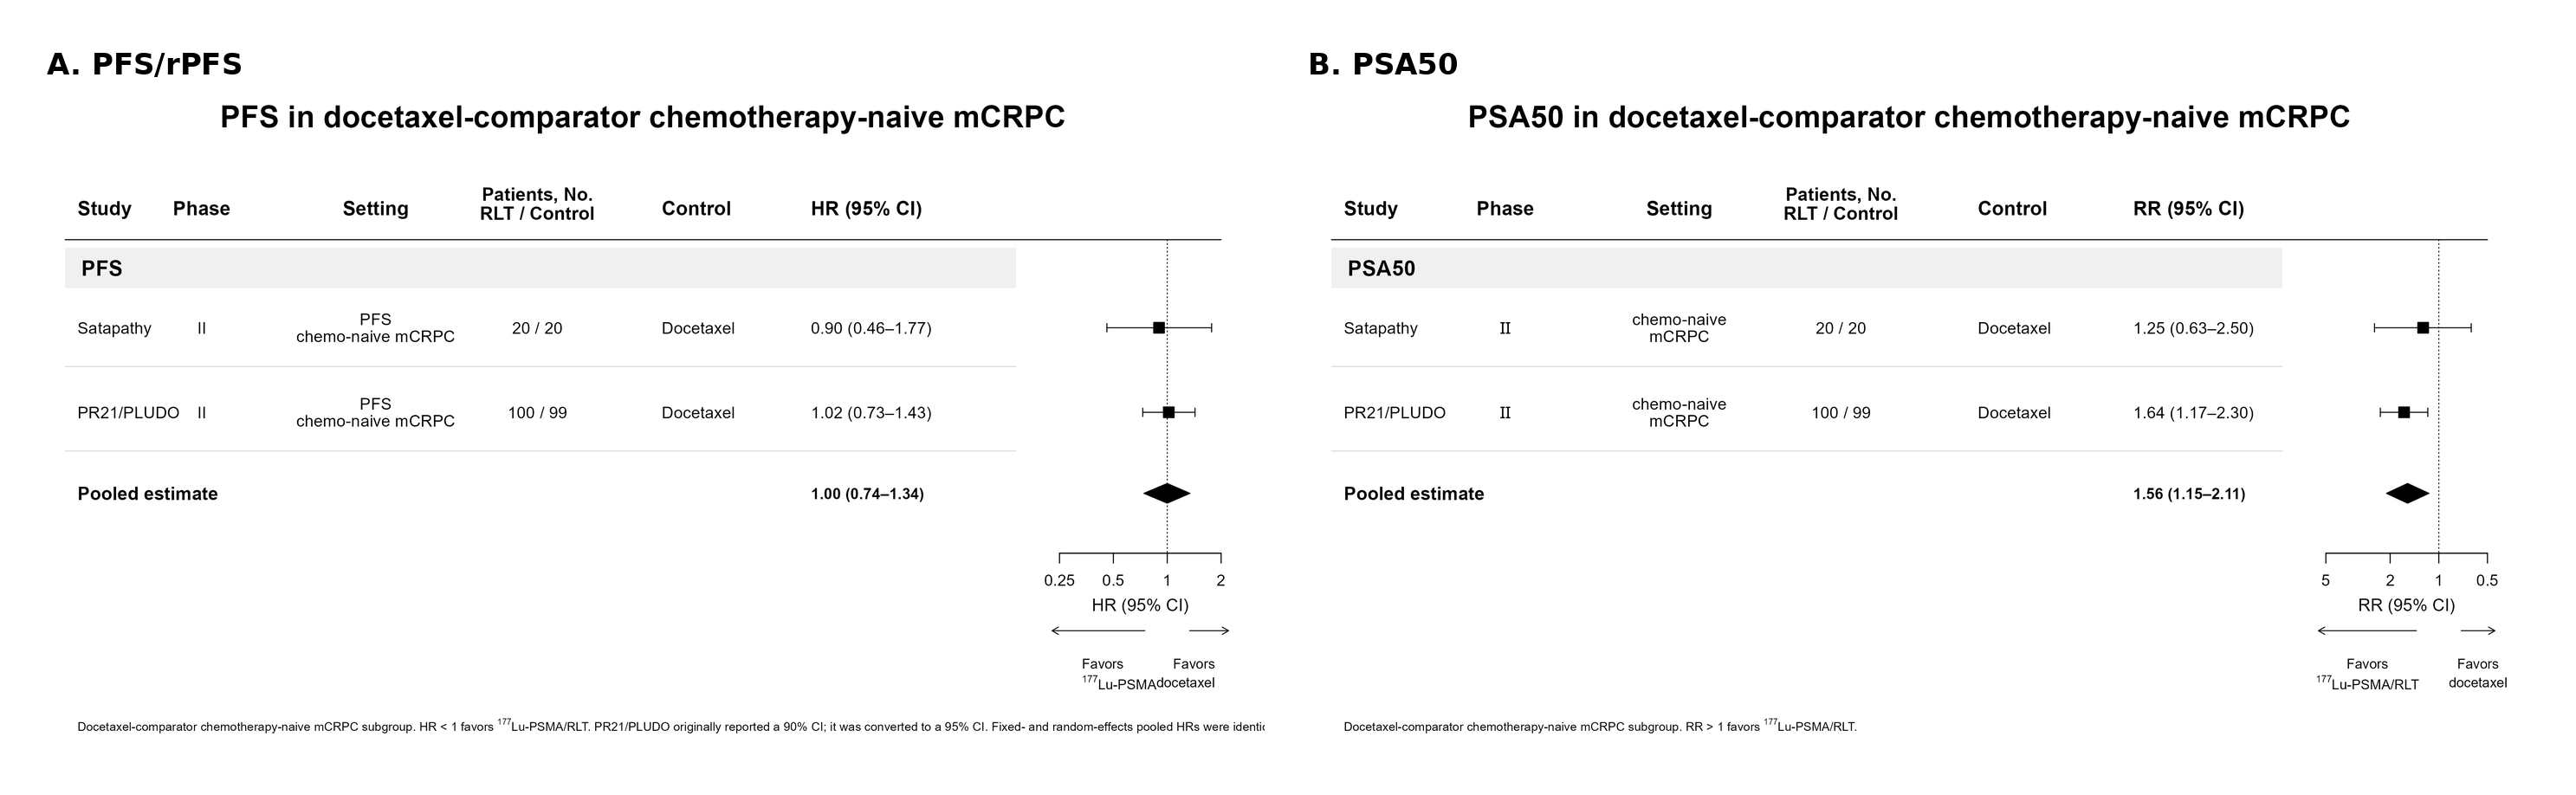


**eFigure 7. Evidence distribution summary across included clinical subgroups**


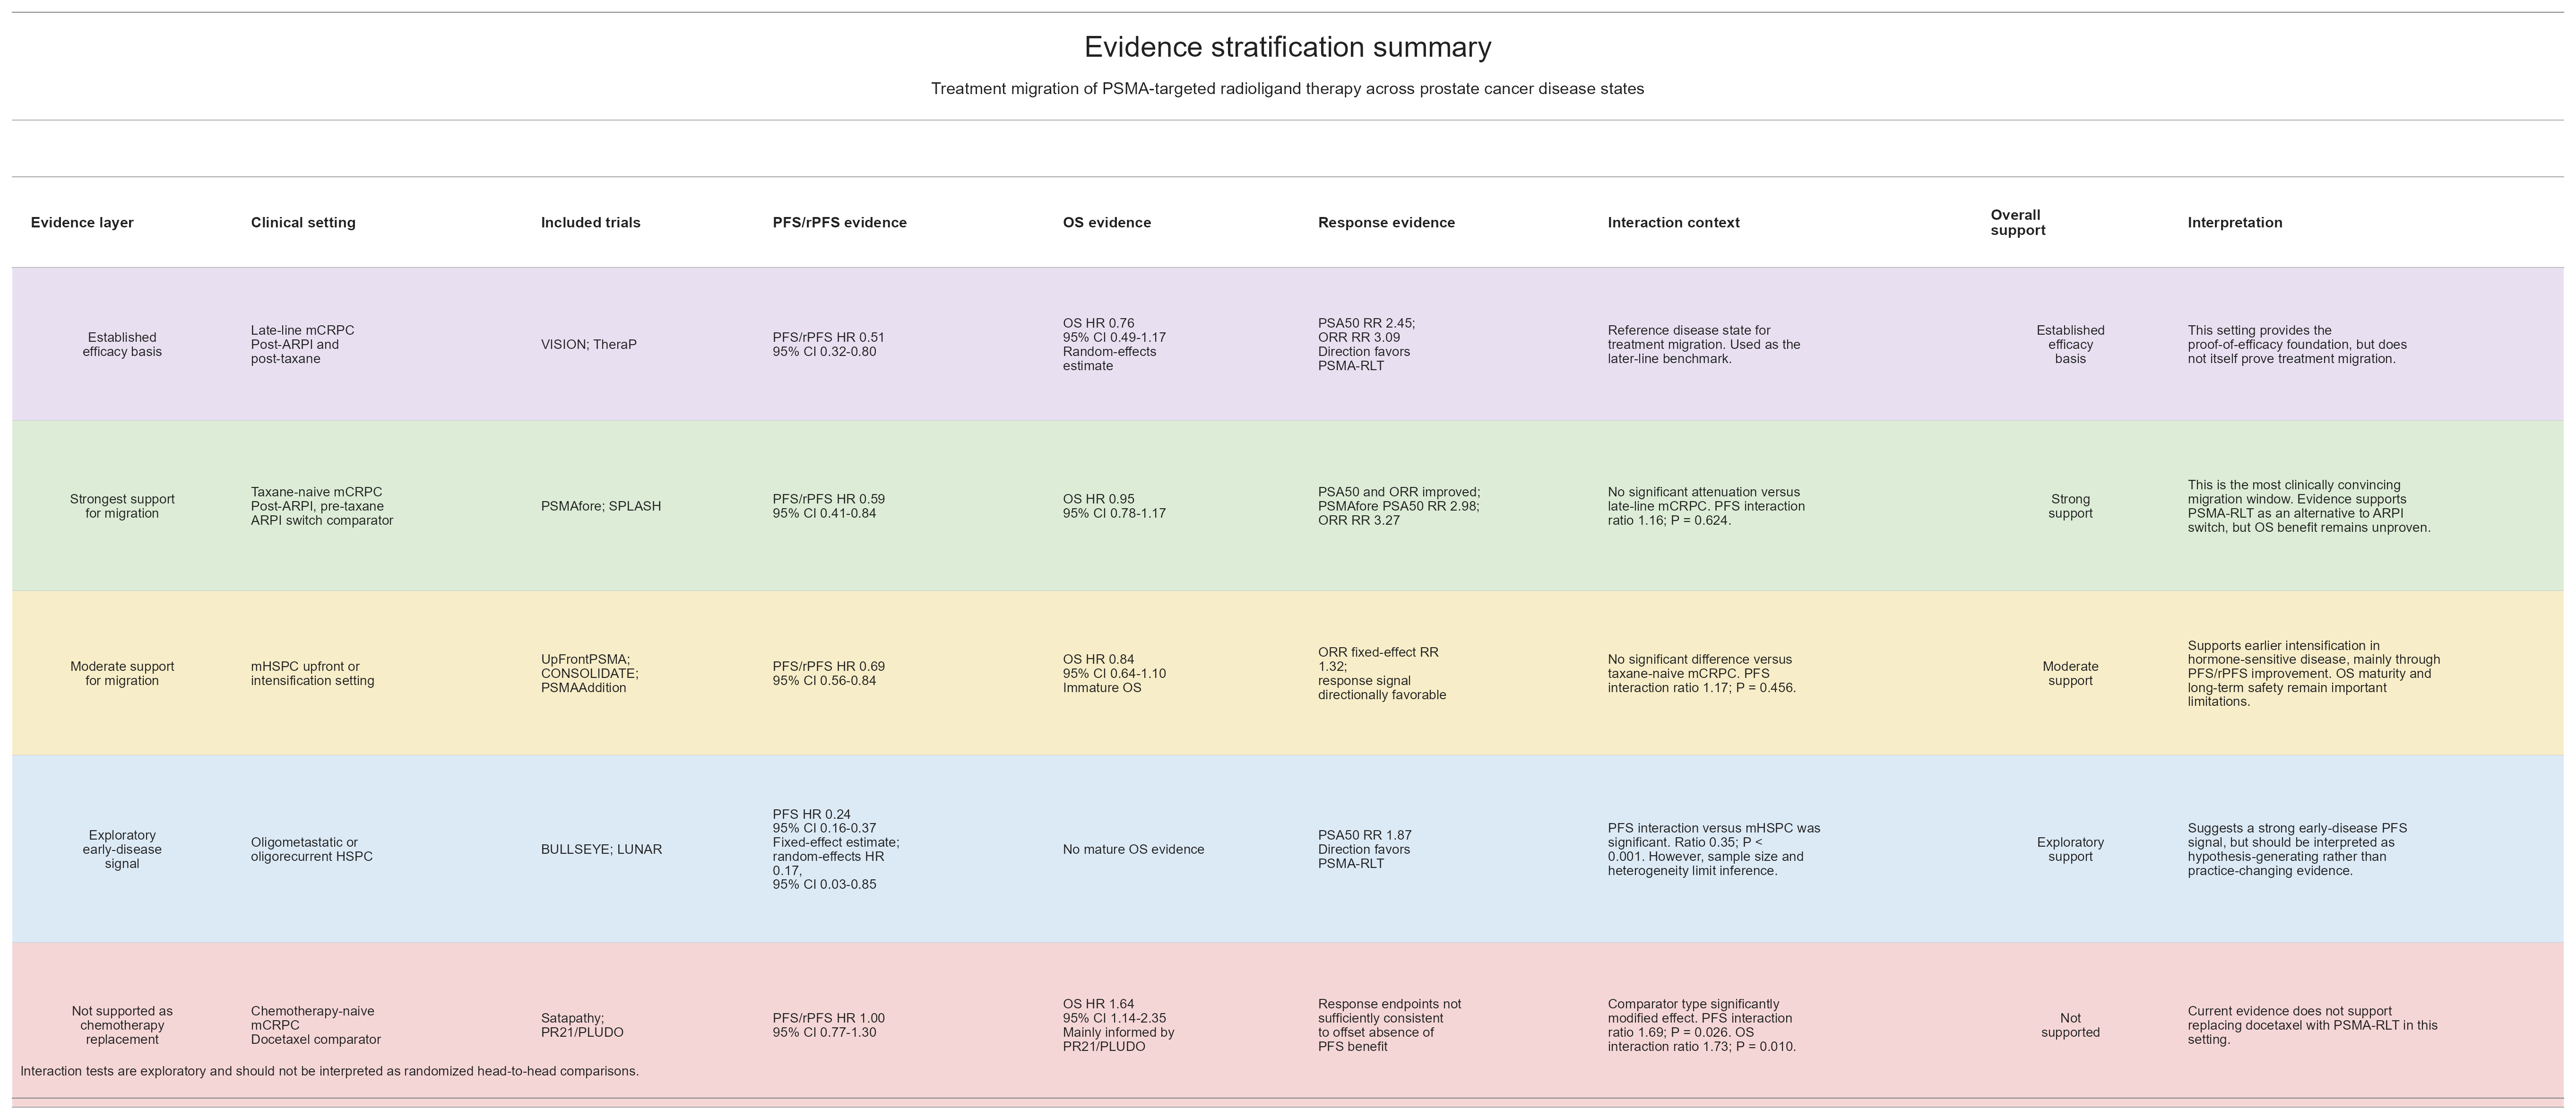


**eFigure 8. Grade >=3 adverse event forest plots**


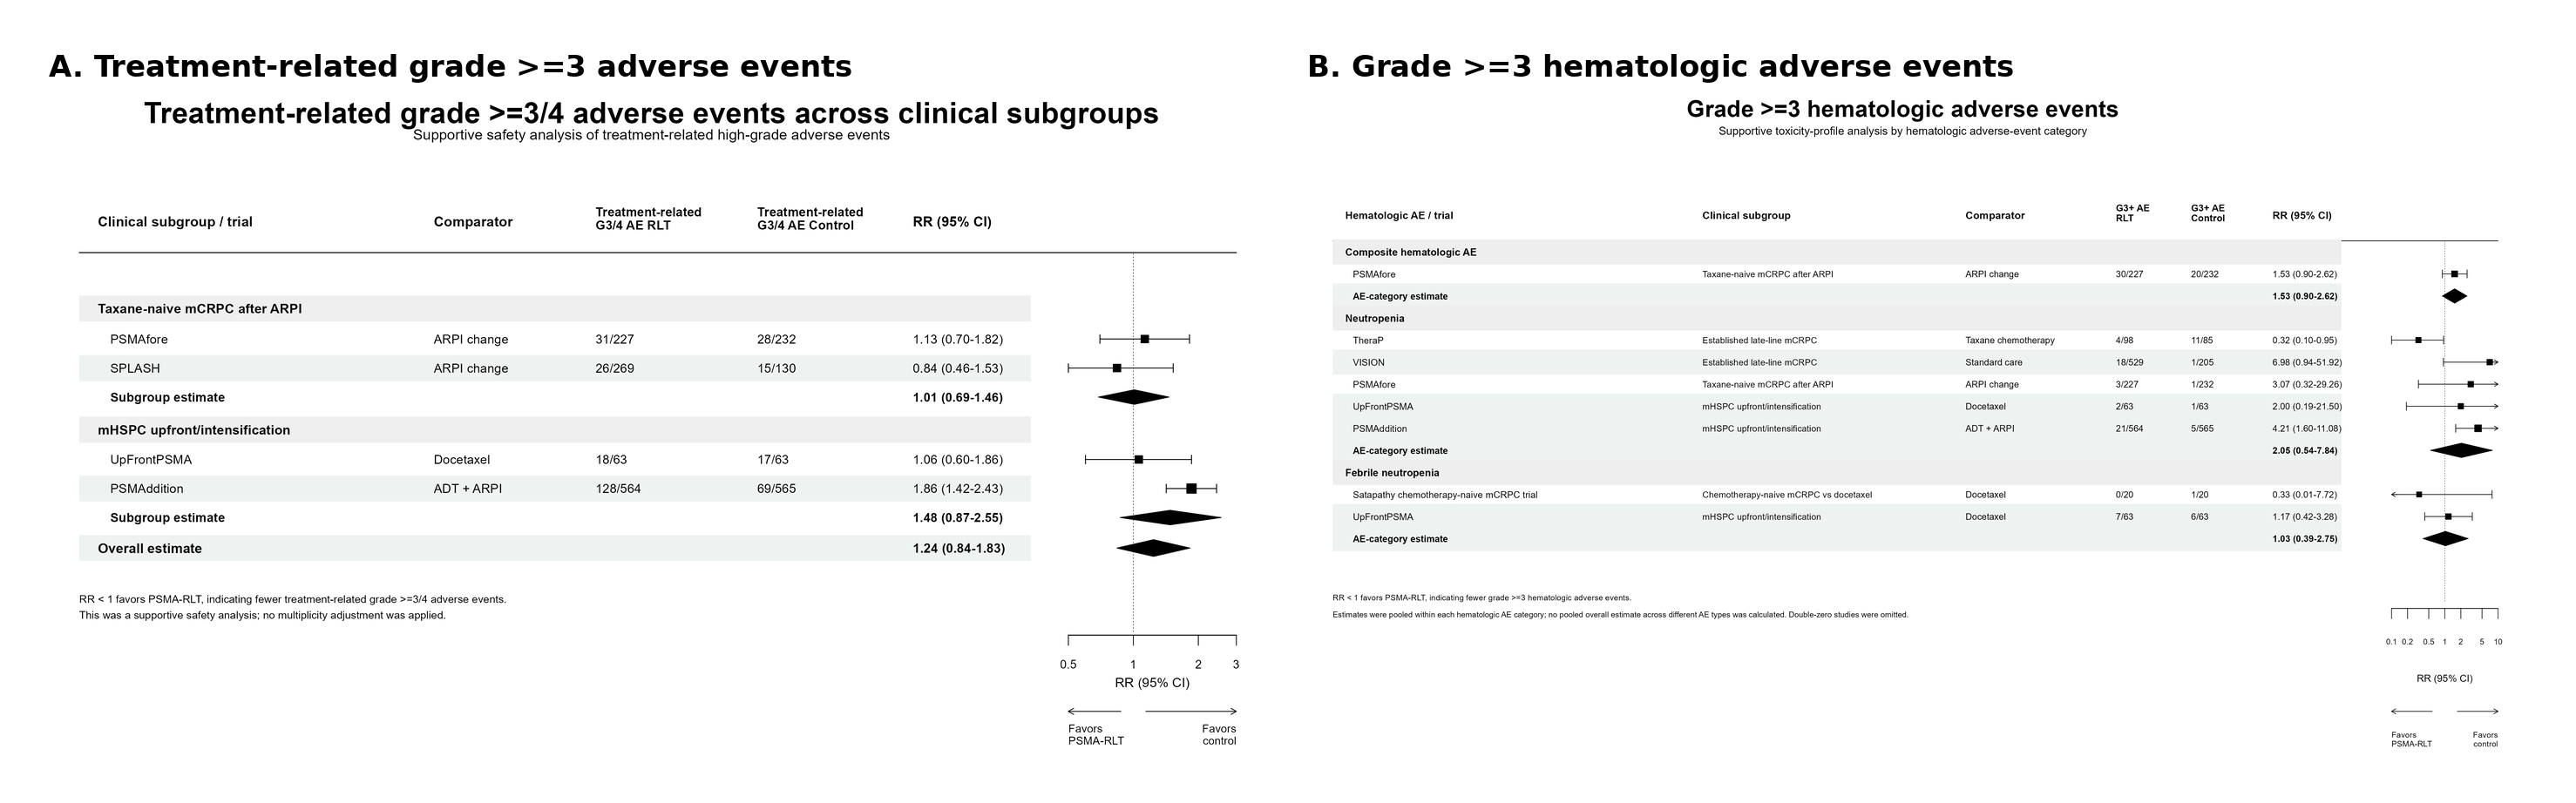


**eFigure 9. Risk-of-bias summary for included randomized trials**


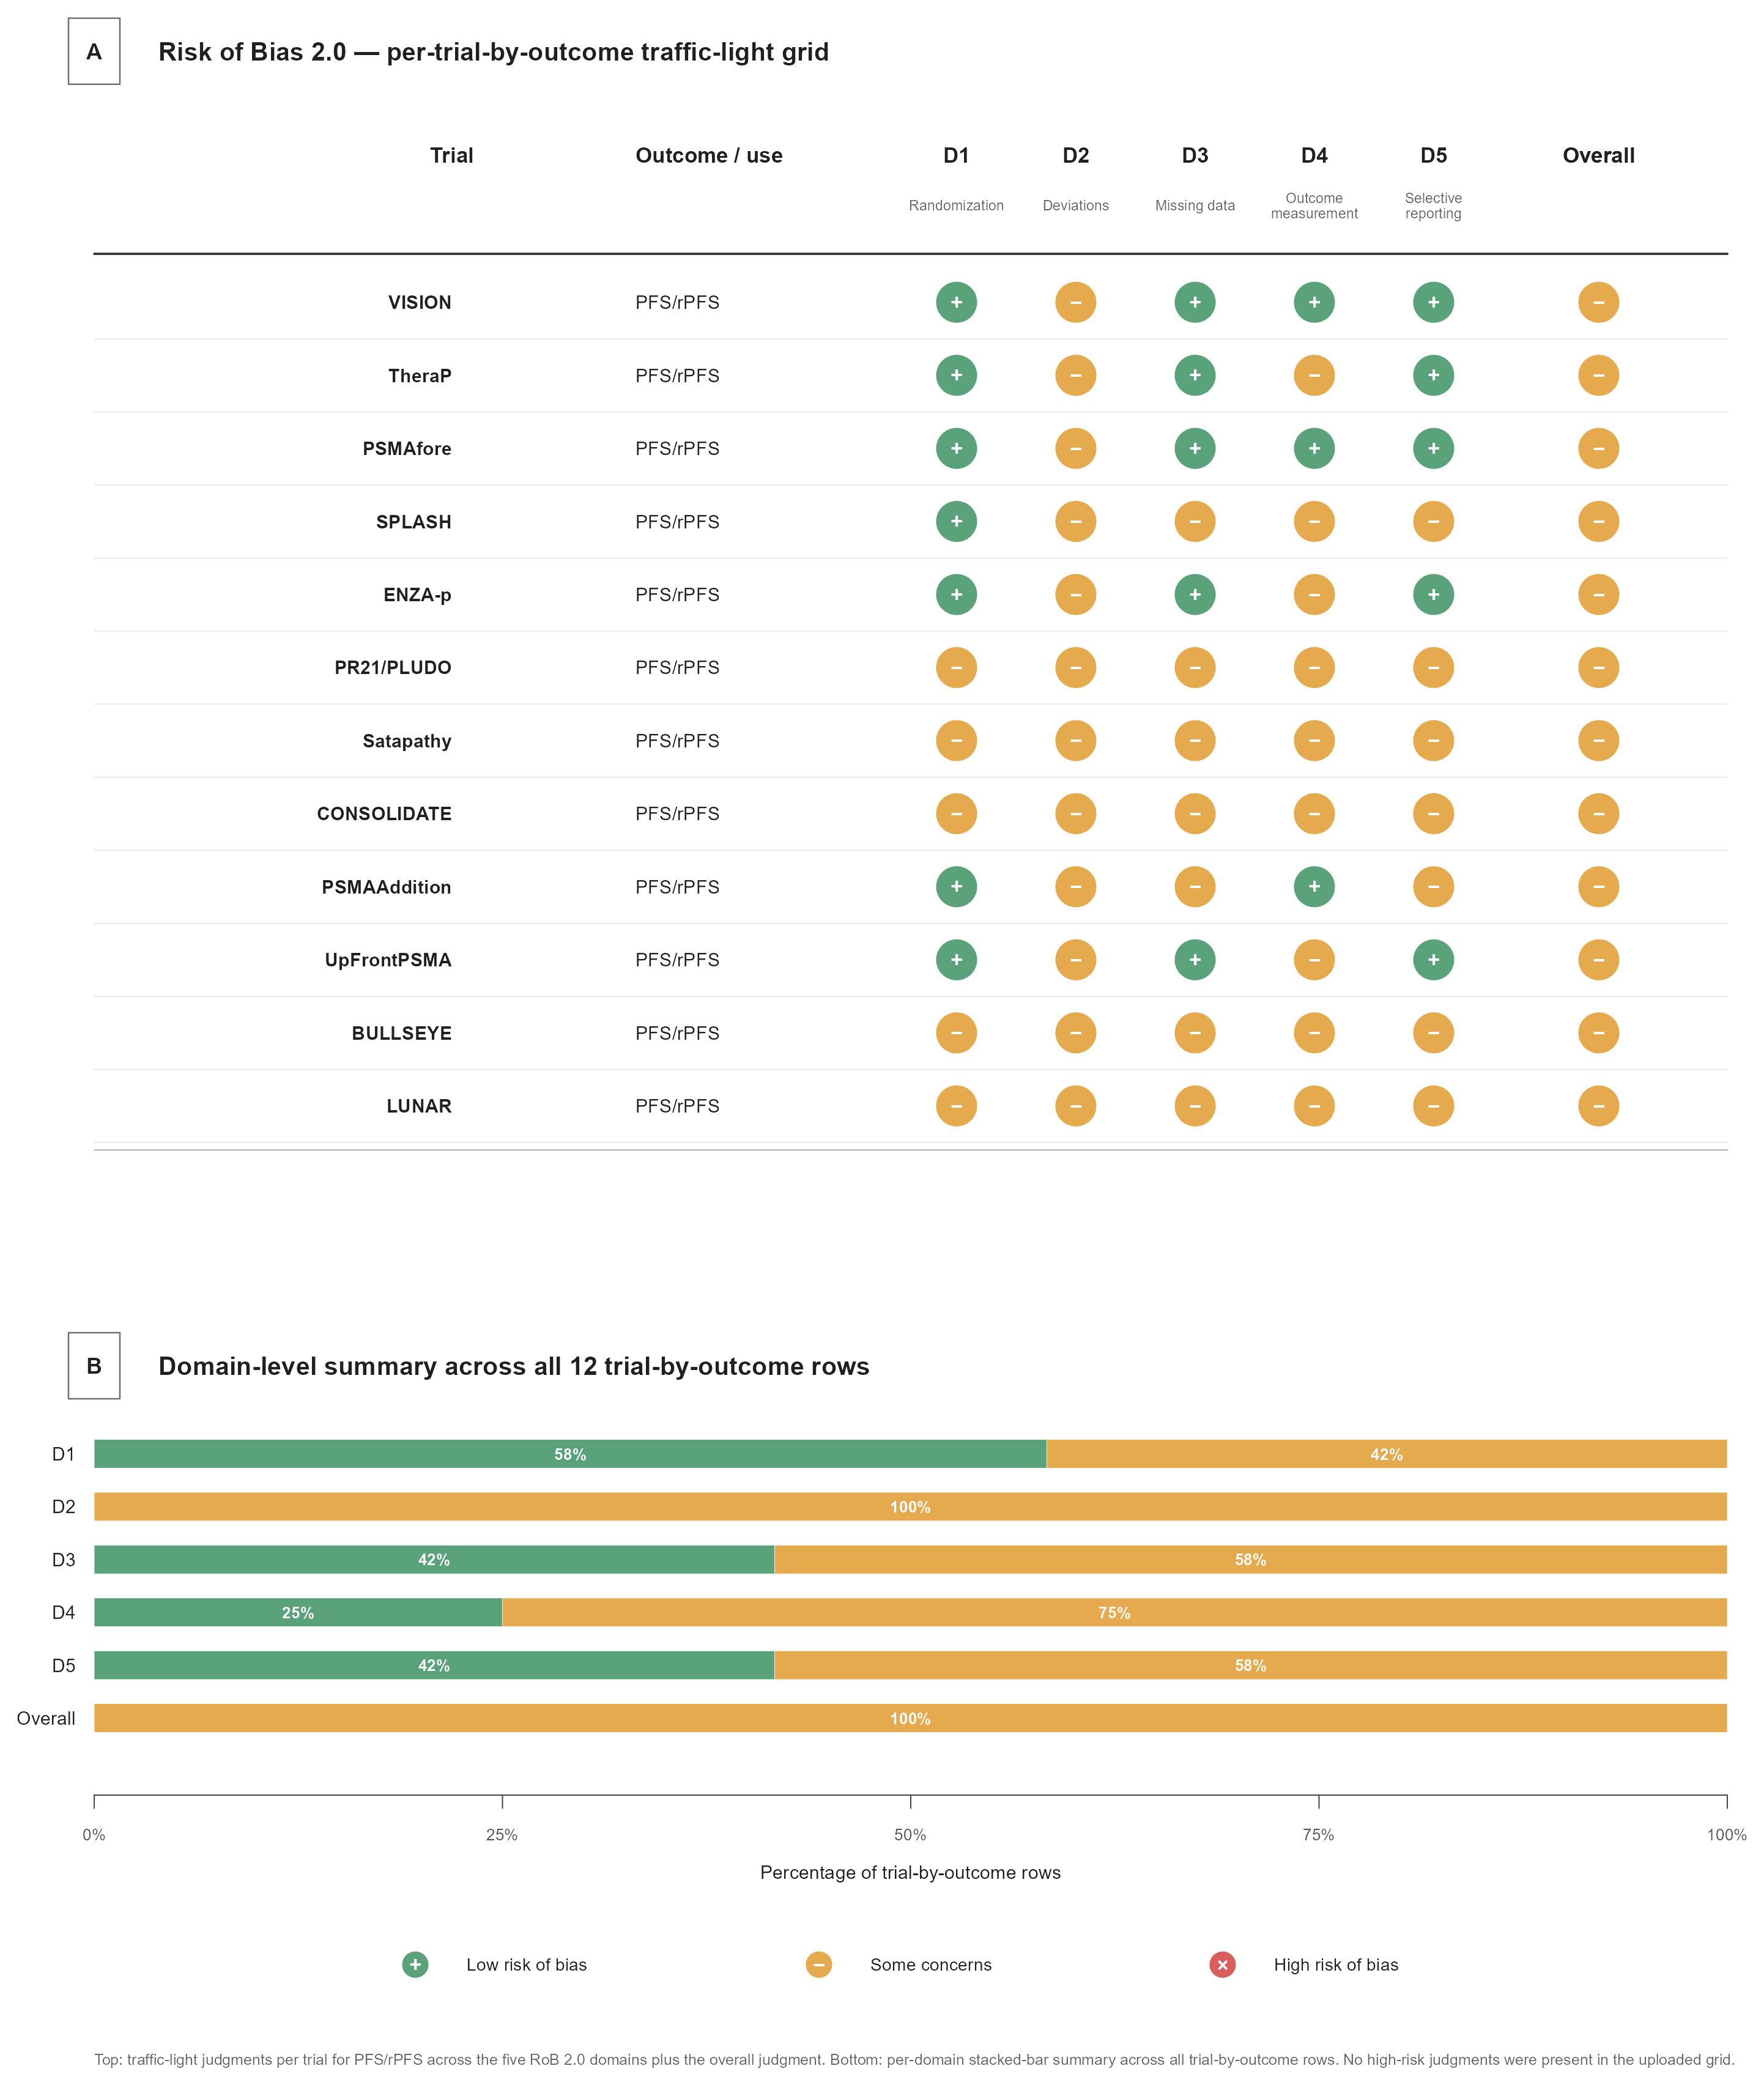


**eFigure 10. Overall PFS/rPFS funnel plot**


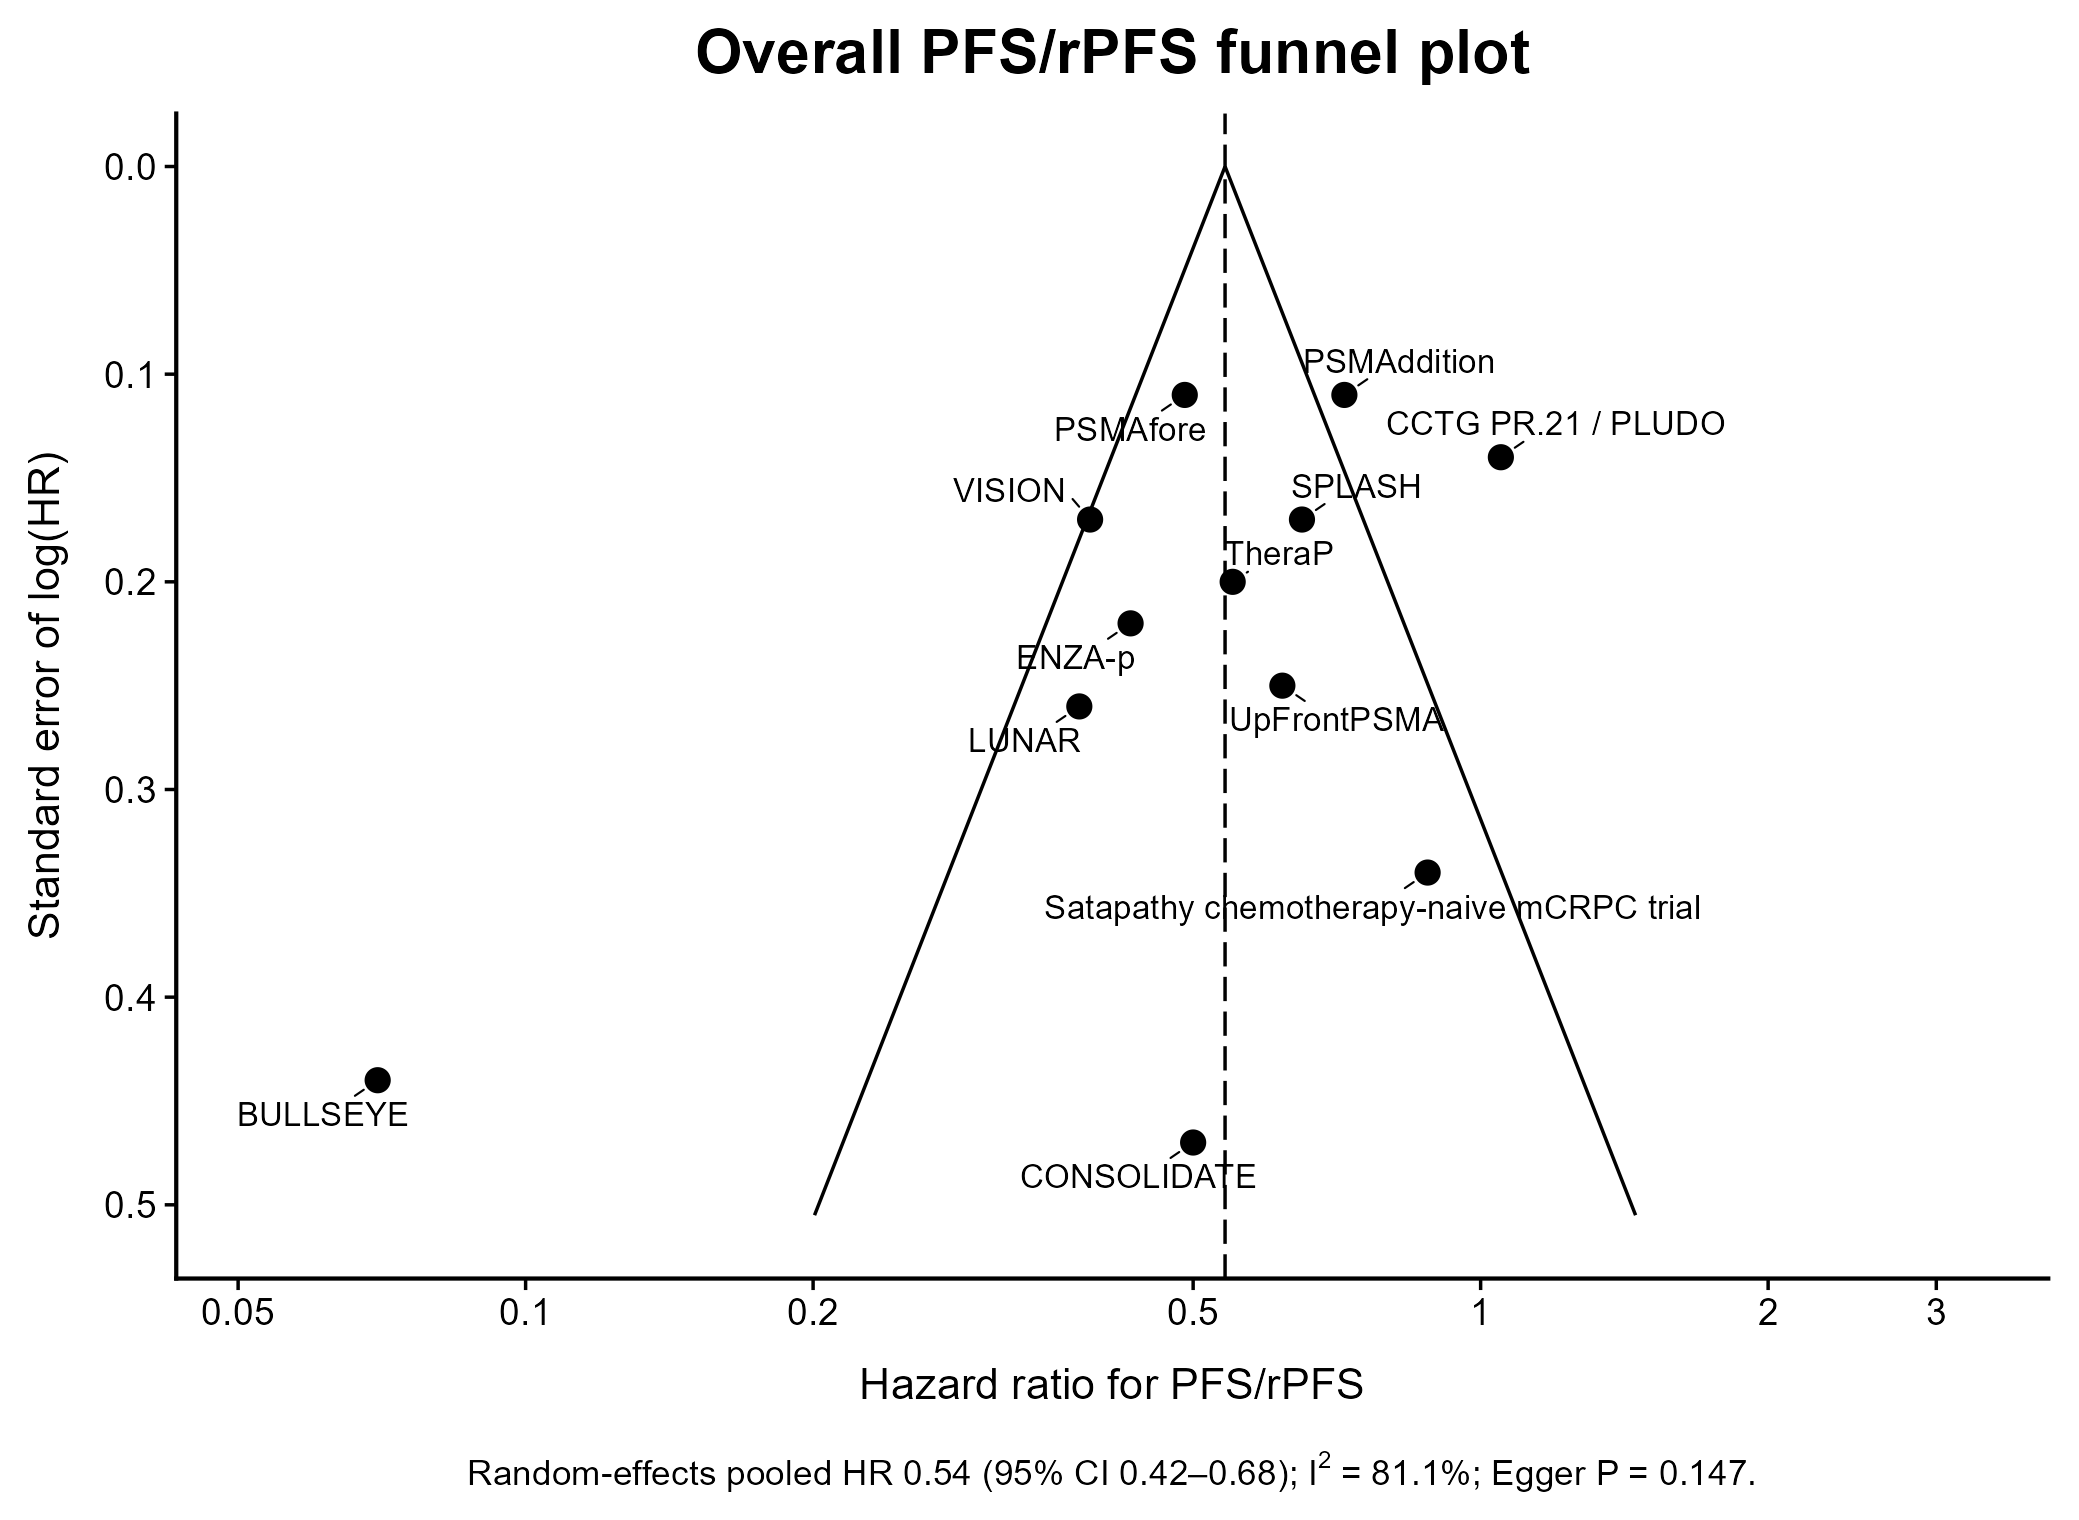

Supplement: Supplementary file 3 [file b05450373c6c00302cc36b13.docx]
