# Supplementary material
Source: Research Square preprint supplement (doi:10.21203/rs.3.rs-10243396/v1)
Supplement: Supplementary file 1 [file 07904f6ec7d39499bf75e9d1.docx]

**eFigure 1. Post-chemotherapy or late-line metastatic castration-resistant prostate cancer forest plots.**

Forest plots show study-specific and pooled treatment effects for post-ARPI and post-taxane mCRPC trials. Panel A shows PFS/rPFS, panel B shows OS, panel C shows PSA50 response, and panel D shows objective response rate (ORR). For time-to-event outcomes, HRs less than 1 favor PSMA-RLT. For response outcomes, RRs greater than 1 favor PSMA-RLT. Squares represent study-specific estimates, horizontal lines indicate 95% CIs, and diamonds represent pooled estimates from random-effects models when pooling was appropriate. ARPI = androgen receptor pathway inhibitor; CI = confidence interval; HR = hazard ratio; mCRPC = metastatic castration-resistant prostate cancer; ORR = objective response rate; OS = overall survival; PFS = progression-free survival; PSA50 = prostate-specific antigen decline of at least 50%; rPFS = radiographic progression-free survival; RR = risk ratio; SOC = standard of care.

**eFigure 2. Taxane-naive metastatic castration-resistant prostate cancer forest plots.**

Forest plots show treatment effects for taxane-naive mCRPC after ARPI progression, with PSMA-RLT compared with a change of ARPI. Panel A shows PFS/rPFS, panel B shows OS, panel C shows PSA50 response, and panel D shows ORR. HRs less than 1 for time-to-event outcomes favor PSMA-RLT, and RRs greater than 1 for response outcomes favor PSMA-RLT. Squares represent trial-specific estimates, horizontal lines indicate 95% CIs, and diamonds represent pooled estimates. ARPI = androgen receptor pathway inhibitor; CI = confidence interval; HR = hazard ratio; mCRPC = metastatic castration-resistant prostate cancer; ORR = objective response rate; OS = overall survival; PFS = progression-free survival; PSA50 = prostate-specific antigen decline of at least 50%; PSMA-RLT = prostate-specific membrane antigen-targeted radioligand therapy; rPFS = radiographic progression-free survival; RR = risk ratio.

**eFigure 3. Metastatic hormone-sensitive prostate cancer upfront intensification forest plots.**

Forest plots show treatment effects for upfront or intensified PSMA-RLT strategies in metastatic hormone-sensitive prostate cancer. Panel A shows PFS/rPFS, panel B shows OS, and panel C shows ORR. HRs less than 1 favor PSMA-RLT for time-to-event outcomes, and RRs greater than 1 favor PSMA-RLT for response outcomes. Squares represent study-specific estimates, horizontal lines indicate 95% CIs, and diamonds represent pooled estimates. CONSOLIDATE was not included in the OS plot because an OS HR was unavailable. ADT = androgen deprivation therapy; ARPI = androgen receptor pathway inhibitor; CI = confidence interval; HR = hazard ratio; mHSPC = metastatic hormone-sensitive prostate cancer; ORR = objective response rate; OS = overall survival; PFS = progression-free survival; rPFS = radiographic progression-free survival; RR = risk ratio.

**eFigure 4. Metastatic hormone-sensitive prostate cancer sensitivity-analysis forest plots.**

Sensitivity-analysis forest plots show mHSPC progression and response estimates after including the consolidation-setting trial together with upfront intensification trials. Panel A shows PFS/rPFS and panel B shows ORR. HRs less than 1 favor PSMA-RLT for PFS/rPFS, whereas RRs greater than 1 favor PSMA-RLT for ORR. Squares represent individual study estimates, horizontal lines indicate 95% CIs, and diamonds represent pooled estimates. ADT = androgen deprivation therapy; ARPI = androgen receptor pathway inhibitor; CI = confidence interval; HR = hazard ratio; mHSPC = metastatic hormone-sensitive prostate cancer; ORR = objective response rate; PFS = progression-free survival; PSMA-RLT = prostate-specific membrane antigen-targeted radioligand therapy; rPFS = radiographic progression-free survival; RR = risk ratio.

**eFigure 5. Oligometastatic or oligorecurrent hormone-sensitive prostate cancer forest plots.**

Forest plots show treatment effects in oligometastatic or oligorecurrent hormone-sensitive prostate cancer. Panel A shows PFS/rPFS and panel B shows PSA50 response. HRs less than 1 favor PSMA-RLT for PFS/rPFS, and RRs greater than 1 favor PSMA-RLT for PSA50 response. Squares represent study-specific estimates, horizontal lines indicate 95% CIs, and diamonds represent pooled estimates. A random-effects model was used for PFS/rPFS because of substantial between-study heterogeneity, whereas the PSA50 analysis used a fixed-effect model. ADT = androgen deprivation therapy; CI = confidence interval; HR = hazard ratio; HSPC = hormone-sensitive prostate cancer; PFS = progression-free survival; PSA50 = prostate-specific antigen decline of at least 50%; PSMA-RLT = prostate-specific membrane antigen-targeted radioligand therapy; rPFS = radiographic progression-free survival; RR = risk ratio; SBRT = stereotactic body radiotherapy.

**eFigure 6. Docetaxel-comparator chemotherapy-naive metastatic castration-resistant prostate cancer forest plots.**

Forest plots show treatment effects in chemotherapy-naive mCRPC trials comparing PSMA-RLT with docetaxel. Panel A shows PFS/rPFS and panel B shows PSA50 response. HRs less than 1 favor PSMA-RLT for PFS/rPFS, and RRs greater than 1 favor PSMA-RLT for PSA50 response. Squares represent study-specific estimates, horizontal lines indicate 95% CIs, and diamonds represent pooled estimates. For the PR21/PLUDO trial, the originally reported 90% CI for PFS/rPFS was converted to a 95% CI for display and pooling. CI = confidence interval; HR = hazard ratio; mCRPC = metastatic castration-resistant prostate cancer; PFS = progression-free survival; PSA50 = prostate-specific antigen decline of at least 50%; PSMA-RLT = prostate-specific membrane antigen-targeted radioligand therapy; rPFS = radiographic progression-free survival; RR = risk ratio.

**eFigure 7. Evidence stratification summary across included clinical subgroups.**

The evidence stratification summary organizes randomized PSMA-RLT evidence by clinical setting, included trials, PFS/rPFS evidence, OS evidence, response evidence, interaction context, overall support, and clinical interpretation. Rows distinguish the established late-line reference setting, the strongest current migration setting in taxane-naive mCRPC after ARPI progression, mHSPC upfront or intensification settings, oligometastatic or oligorecurrent HSPC, and docetaxel-comparator chemotherapy-naive mCRPC. The summary is intended to support interpretation of treatment migration and does not represent randomized head-to-head comparisons between all subgroups. ARPI = androgen receptor pathway inhibitor; CI = confidence interval; HR = hazard ratio; HSPC = hormone-sensitive prostate cancer; mCRPC = metastatic castration-resistant prostate cancer; mHSPC = metastatic hormone-sensitive prostate cancer; ORR = objective response rate; OS = overall survival; PFS = progression-free survival; PSA50 = prostate-specific antigen decline of at least 50%; PSMA-RLT = prostate-specific membrane antigen-targeted radioligand therapy; rPFS = radiographic progression-free survival; RR = risk ratio.

**eFigure 8. Grade 3 or higher adverse-event forest plots.**

Forest plots show supportive safety analyses for high-grade adverse events. Panel A shows treatment-related grade 3 or 4 adverse events across clinical subgroups, and panel B shows grade 3 or higher hematologic adverse events by hematologic category and trial. RRs less than 1 favor PSMA-RLT, indicating fewer adverse events, whereas RRs greater than 1 favor the comparator. Squares represent study-specific estimates, horizontal lines indicate 95% CIs, and diamonds represent category or subgroup pooled estimates. Double-zero studies were omitted from pooled estimates when not estimable. ADT = androgen deprivation therapy; AE = adverse event; ARPI = androgen receptor pathway inhibitor; CI = confidence interval; mCRPC = metastatic castration-resistant prostate cancer; mHSPC = metastatic hormone-sensitive prostate cancer; PSMA-RLT = prostate-specific membrane antigen-targeted radioligand therapy; RR = risk ratio.

**eFigure 9. Risk-of-bias summary for included randomized trials.**

Risk-of-bias assessments are shown according to the Cochrane RoB 2.0 tool. Panel A shows per-trial, per-outcome traffic-light judgments for PFS/rPFS across five domains: bias arising from randomization, deviations from intended interventions, missing outcome data, outcome measurement, and selective reporting. Panel B summarizes domain-level judgments across all trial-by-outcome rows as stacked percentages. Green circles indicate low risk of bias, yellow circles indicate some concerns, and red circles indicate high risk of bias. No high-risk judgments were assigned in the displayed grid. PFS = progression-free survival; rPFS = radiographic progression-free survival; RoB 2.0 = revised Cochrane risk-of-bias tool for randomized trials.

**eFigure 10. Overall PFS/rPFS funnel plot.**

The funnel plot displays study-specific PFS/rPFS hazard ratios against the standard error of the log hazard ratio. The dashed vertical line represents the random-effects pooled estimate, and diagonal lines indicate the expected pseudo-95% limits around the pooled effect. Trial labels identify individual randomized comparisons included in the overall exploratory PFS/rPFS assessment. The overall random-effects pooled HR was 0.54 (95% CI, 0.42-0.68), with substantial heterogeneity (I2 = 81.1%); Egger regression did not show statistically significant asymmetry (P = 0.147). CI = confidence interval; HR = hazard ratio; I2 = inconsistency statistic; PFS = progression-free survival; rPFS = radiographic progression-free survival.
