# Supplementary material
Source: Research Square preprint supplement (doi:10.21203/rs.3.rs-10243396/v1)
Supplement: Supplementary file 2 [file 75fdc004f467222630982cf5.docx]

| **Section and Topic** | **Item #** | **Checklist item** | **Location where item is reported** |
| --- | --- | --- | --- |
| **TITLE** | | |  |
| Title | 1 | Identify the report as a systematic review. | Title page/title. The report is identified as a randomized-evidence meta-analysis: " **Comparator-dependent evidence for earlier PSMA-targeted radioligand therapy in prostate cancer: a systematic review and meta-analysis of randomized trials** ." The abstract and Methods also identify the report as a systematic review and meta-analysis. |
| **ABSTRACT** | | |  |
| Abstract | 2 | See the PRISMA 2020 for Abstracts checklist. | Abstract. The abstract summarizes the background, search date and sources, randomized-trial eligibility, synthesis methods, main efficacy and safety outcomes, key results, and conclusion regarding selective, comparator-dependent PSMA-RLT treatment migration. |
| **INTRODUCTION** | | |  |
| Rationale | 3 | Describe the rationale for the review in the context of existing knowledge. | Introduction, paragraphs 1-3. The rationale is described in the context of established late-line PSMA-RLT evidence, emerging earlier-disease trials, heterogeneity in disease setting and comparator choice, and uncertainty about when treatment migration is justified. |
| Objectives | 4 | Provide an explicit statement of the objective(s) or question(s) the review addresses. | Introduction, final paragraph; Abstract. The objective is to synthesize randomized evidence across the prostate cancer continuum and determine the disease settings and comparator contexts in which earlier PSMA-RLT use is supported. |
| **METHODS** | | |  |
| Eligibility criteria | 5 | Specify the inclusion and exclusion criteria for the review and how studies were grouped for the syntheses. | Methods, Eligibility Criteria and Outcomes; Supplement 1, eTables 1-2. Inclusion and exclusion criteria are specified, and studies are grouped into prespecified clinical strata: late-line mCRPC, taxane-naive post-ARPI mCRPC, docetaxel-comparator chemotherapy-naive mCRPC, mHSPC upfront/intensification, oligometastatic or oligorecurrent HSPC, and the ENZA-p first-line combination setting. |
| Information sources | 6 | Specify all databases, registers, websites, organisations, reference lists and other sources searched or consulted to identify studies. Specify the date when each source was last searched or consulted. | Methods, Search Strategy, Study Selection, and Data Extraction; Supplement 1, eAppendix 1. PubMed/MEDLINE, Cochrane CENTRAL, Scopus, Web of Science Core Collection, ClinicalTrials.gov, relevant conference proceedings, trial registries, reference lists, and known trial acronyms were searched from inception through June 17, 2026. |
| Search strategy | 7 | Present the full search strategies for all databases, registers and websites, including any filters and limits used. | Supplement 1, eAppendix 1. Complete database-specific search strategies are provided for PubMed/MEDLINE, Cochrane CENTRAL, Scopus, Web of Science Core Collection, and ClinicalTrials.gov, including search terms and limits/notes. |
| Selection process | 8 | Specify the methods used to decide whether a study met the inclusion criteria of the review, including how many reviewers screened each record and each report retrieved, whether they worked independently, and if applicable, details of automation tools used in the process. | Methods, Search Strategy, Study Selection, and Data Extraction. Two reviewers independently screened titles and abstracts, assessed full-text eligibility, and resolved disagreements by consensus, with adjudication by a third reviewer when required. |
| Data collection process | 9 | Specify the methods used to collect data from reports, including how many reviewers collected data from each report, whether they worked independently, any processes for obtaining or confirming data from study investigators, and if applicable, details of automation tools used in the process. | Methods, Search Strategy, Study Selection, and Data Extraction. Two reviewers independently extracted data using a standardized form; published articles, supplementary appendices, trial registries, conference materials, and sponsor-reported results were cross-checked for consistency. |
| Data items | 10a | List and define all outcomes for which data were sought. Specify whether all results that were compatible with each outcome domain in each study were sought (e.g. for all measures, time points, analyses), and if not, the methods used to decide which results to collect. | Methods, Eligibility Criteria and Outcomes. Outcomes sought included the trial-defined time-to-progression endpoint (rPFS, PFS, or PSA progression-free survival), overall survival, PSA50 response, objective response rate, patient-reported outcomes, pain and opioid-related outcomes, and grade 3 or higher adverse events. |
| 10b | List and define all other variables for which data were sought (e.g. participant and intervention characteristics, funding sources). Describe any assumptions made about any missing or unclear information. | Methods, Search Strategy, Study Selection, and Data Extraction; Table 1; Supplement 1, eTables 1-5. Extracted variables included trial design, disease setting, prior ARPI and taxane exposure, PSMA PET and FDG PET selection criteria, radioligand/radionuclide, administered activity, treatment interval and cycles, concomitant therapy, comparator, analysis populations, follow-up, efficacy outcomes, patient-reported outcomes, and adverse events. |
| Study risk of bias assessment | 11 | Specify the methods used to assess risk of bias in the included studies, including details of the tool(s) used, how many reviewers assessed each study and whether they worked independently, and if applicable, details of automation tools used in the process. | Methods, Data Synthesis; Results, Sensitivity Analyses and Bias Assessment; Supplement 1, eTable 10 and eFigure 9. Risk of bias was assessed for each outcome using the revised Cochrane Risk of Bias 2 tool. |
| Effect measures | 12 | Specify for each outcome the effect measure(s) (e.g. risk ratio, mean difference) used in the synthesis or presentation of results. | Methods, Data Synthesis. Time-to-event outcomes were summarized as hazard ratios (HRs) with 95% confidence intervals (CIs); binary outcomes were summarized as risk ratios (RRs) with 95% CIs. |
| Synthesis methods | 13a | Describe the processes used to decide which studies were eligible for each synthesis (e.g. tabulating the study intervention characteristics and comparing against the planned groups for each synthesis (item #5)). | Methods, Eligibility Criteria and Outcomes; Methods, Data Synthesis; Supplement 1, eTables 1-6 and eTable 9. Studies were assigned to prespecified clinical strata before synthesis; clinically comparable progression endpoints were pooled within strata, and ENZA-p was analyzed separately as an additive combination strategy. |
| 13b | Describe any methods required to prepare the data for presentation or synthesis, such as handling of missing summary statistics, or data conversions. | Methods, Search Strategy, Study Selection, and Data Extraction; Methods, Data Synthesis; Supplement 1, eTables 6 and 9. HRs were pooled on the logarithmic scale using inverse-variance weighting; binary event data were summarized as RRs; studies with zero events in both arms were displayed as not estimable and excluded from the corresponding RR pooling. |
| 13c | Describe any methods used to tabulate or visually display results of individual studies and syntheses. | Table 1; Figures 1-4; Supplement 1, eTables 1-11 and eFigures 1-10. Results are displayed using the PRISMA flow diagram, study-characteristics tables, analysis-ready effect-size tables, subgroup interaction plots, forest plots, evidence-distribution summaries, risk-of-bias displays, and funnel plots. |
| 13d | Describe any methods used to synthesize results and provide a rationale for the choice(s). If meta-analysis was performed, describe the model(s), method(s) to identify the presence and extent of statistical heterogeneity, and software package(s) used. | Methods, Data Synthesis. Random-effects models were used because clinical heterogeneity was anticipated across disease states, treatment lines, imaging-selection criteria, intervention strategies, and comparators. Between-study heterogeneity was quantified using I2. |
| 13e | Describe any methods used to explore possible causes of heterogeneity among study results (e.g. subgroup analysis, meta-regression). | Methods, Data Synthesis; Results, Treatment-Effect Modification; Figures 2-3; Supplement 1, eTable 11 and eFigure 7. Heterogeneity and effect modification were explored through prespecified subgroup interaction analyses, ratios of subgroup HRs, sensitivity analyses, and clinical-stratum summaries. |
| 13f | Describe any sensitivity analyses conducted to assess robustness of the synthesized results. | Methods, Data Synthesis; Results, Sensitivity Analyses and Bias Assessment; Supplement 1, eTable 11. Sensitivity analyses excluded studies available only as conference abstracts or presentations and repeated analyses using peer-reviewed full-text trials when sufficient evidence remained. |
| Reporting bias assessment | 14 | Describe any methods used to assess risk of bias due to missing results in a synthesis (arising from reporting biases). | Methods, Data Synthesis; Results, Sensitivity Analyses and Bias Assessment; Supplement 1, eFigures 9-10 and eTables 10-11. Funnel plots and Egger regression were used only when the number of available comparisons was sufficient; Egger regression was not statistically significant for the overall PFS/rPFS analysis. |
| Certainty assessment | 15 | Describe any methods used to assess certainty (or confidence) in the body of evidence for an outcome. | Methods, Data Synthesis; Results, Sensitivity Analyses and Bias Assessment. A formal GRADE certainty assessment was not performed; confidence in the evidence was addressed through RoB 2 assessment, data-maturity distinctions, sensitivity analyses, and cautious interpretation of conference-reported or immature datasets. |
| **RESULTS** | | |  |
| Study selection | 16a | Describe the results of the search and selection process, from the number of records identified in the search to the number of studies included in the review, ideally using a flow diagram. | Results, Study Selection and Characteristics; Figure 1. The search identified 1,497 records; 421 duplicates were removed; 1,076 records were screened; 45 reports were assessed for eligibility; and 12 randomized trials involving 3,767 patients were included in the systematic review and quantitative meta-analysis. |
| 16b | Cite studies that might appear to meet the inclusion criteria, but which were excluded, and explain why they were excluded. | Figure 1. Full-text exclusion reasons are reported in the PRISMA flow diagram, including ineligible study design, overlapping populations, and conference abstracts without adequate extractable randomized outcome data. |
| Study characteristics | 17 | Cite each included study and present its characteristics. | Results, Study Selection and Characteristics; Table 1; Supplement 1, eTables 1-5. Characteristics of the 12 included randomized trials are presented, including trial source, design, disease setting, eligibility criteria, imaging selection, baseline disease burden, prior therapy, treatment regimen, and comparator details. |
| Risk of bias in studies | 18 | Present assessments of risk of bias for each included study. | Results, Sensitivity Analyses and Bias Assessment; Supplement 1, eTable 10 and eFigure 9. Risk-of-bias judgments are presented for included randomized trials; no high-risk judgments were reported. |
| Results of individual studies | 19 | For all outcomes, present, for each study: (a) summary statistics for each group (where appropriate) and (b) an effect estimate and its precision (e.g. confidence/credible interval), ideally using structured tables or plots. | Results, clinical-stratum sections; Table 1; Supplement 1, eTables 6-9 and eFigures 1-8. Study-level summary statistics, effect estimates, 95% CIs, response outcomes, safety outcomes, and forest plots are reported for individual trials and subgroups. |
| Results of syntheses | 20a | For each synthesis, briefly summarise the characteristics and risk of bias among contributing studies. | Results, clinical-stratum sections; Results, Sensitivity Analyses and Bias Assessment. Each synthesis summarizes the contributing trials, disease setting, comparator context, data maturity, and risk-of-bias profile. |
| 20b | Present results of all statistical syntheses conducted. If meta-analysis was done, present for each the summary estimate and its precision (e.g. confidence/credible interval) and measures of statistical heterogeneity. If comparing groups, describe the direction of the effect. | Results, clinical-stratum sections; Figures 2-4; Supplement 1, eTables 6, 8, 9, and 11 and eFigures 1-8. Statistical syntheses report pooled HRs or RRs with 95% CIs and direction of effect across late-line mCRPC, taxane-naive mCRPC, docetaxel-comparator mCRPC, mHSPC, oligometastatic/oligorecurrent HSPC, and safety outcomes. |
| 20c | Present results of all investigations of possible causes of heterogeneity among study results. | Results, Treatment-Effect Modification; Figures 2-3; Supplement 1, eTable 11 and eFigure 7. Prespecified interaction analyses evaluate comparator type, treatment line, hormone-sensitive versus castration-resistant disease state, and oligometastatic/oligorecurrent versus metastatic hormone-sensitive settings. |
| 20d | Present results of all sensitivity analyses conducted to assess the robustness of the synthesized results. | Results, Sensitivity Analyses and Bias Assessment; Supplement 1, eTable 11. Sensitivity analyses were consistent with the primary findings, including analyses excluding conference-only or presentation-only datasets when sufficient peer-reviewed evidence remained. |
| Reporting biases | 21 | Present assessments of risk of bias due to missing results (arising from reporting biases) for each synthesis assessed. | Results, Sensitivity Analyses and Bias Assessment; Supplement 1, eFigures 9-10. Funnel plots showed no evident asymmetry, and Egger regression for the overall PFS/rPFS analysis was not statistically significant. |
| Certainty of evidence | 22 | Present assessments of certainty (or confidence) in the body of evidence for each outcome assessed. | Results, Sensitivity Analyses and Bias Assessment; Discussion, limitations paragraph. No formal GRADE certainty ratings were reported; the manuscript presents RoB 2 judgments, sensitivity analyses, and data-maturity qualifications to support evidence interpretation. |
| **DISCUSSION** | | |  |
| Discussion | 23a | Provide a general interpretation of the results in the context of other evidence. | Discussion, paragraphs 1-4. Results are interpreted in relation to late-line VISION and TheraP evidence, earlier taxane-naive mCRPC trials, docetaxel and ARPI-switch comparator contexts, mHSPC intensification trials, oligometastatic/oligorecurrent evidence, and biologic/clinical patient-selection considerations. |
| 23b | Discuss any limitations of the evidence included in the review. | Discussion, limitations paragraph. Limitations of the evidence include immature or conference-reported datasets, phase 2 trials in several settings, heterogeneous endpoints and comparators, limited OS maturity in earlier disease, and incomplete reporting of some patient-reported and safety outcomes. |
| 23c | Discuss any limitations of the review processes used. | Discussion, limitations paragraph. Review-process limitations include reliance on study-level aggregate data, inability to adjust for PSMA PET uptake, FDG-discordant disease, tumor volume, visceral metastases, marrow reserve, crossover, or subsequent therapy, and the need to interpret cross-continuum pooling as exploratory. |
| 23d | Discuss implications of the results for practice, policy, and future research. | Discussion, final paragraphs; Conclusion; Figures 2-4. Implications are framed as selective treatment migration: strongest support after ARPI progression and before taxane therapy, no current support for replacing docetaxel, and promising but immature hormone-sensitive and oligometastatic evidence awaiting mature survival data. |
| **OTHER INFORMATION** | | |  |
| Registration and protocol | 24a | Provide registration information for the review, including register name and registration number, or state that the review was not registered. | Methods, Reporting and Protocol. The review was registered in PROSPERO (CRD420261430865). |
| 24b | Indicate where the review protocol can be accessed, or state that a protocol was not prepared. | Methods, Reporting and Protocol. The protocol was registered in PROSPERO under CRD420261430865 and can be accessed through the PROSPERO registry. |
| 24c | Describe and explain any amendments to information provided at registration or in the protocol. | Methods, Reporting and Protocol; Methods, Data Synthesis. No protocol amendments affecting the primary interpretation are reported; sensitivity analyses and evidence-maturity distinctions are described in the Methods. |
| Support | 25 | Describe sources of financial or non-financial support for the review, and the role of the funders or sponsors in the review. | Article Information, Funding/Support and Role of the Funder/Sponsor. Funding/support and the role of any funder or sponsor are reported in the manuscript or submission metadata. |
| Competing interests | 26 | Declare any competing interests of review authors. | Article Information, Conflict of Interest Disclosures. Competing-interest disclosures for the review authors are reported in the manuscript or submission metadata. |
| Availability of data, code and other materials | 27 | Report which of the following are publicly available and where they can be found: template data collection forms; data extracted from included studies; data used for all analyses; analytic code; any other materials used in the review. | Article Information, Data Sharing Statement; Supplement 1, eTable 9; article and Supplement 1. Extracted summary data and the analysis-ready effect-size dataset used for forest plots are available in the article and Supplement 1; analytic code is not reported as publicly available unless provided separately. |

*From:*  Page MJ, McKenzie JE, Bossuyt PM, Boutron I, Hoffmann TC, Mulrow CD, et al. The PRISMA 2020 statement: an updated guideline for reporting systematic reviews. BMJ 2021;372:n71. doi: 10.1136/bmj.n71. This work is licensed under CC BY 4.0. To view a copy of this license, visit <https://creativecommons.org/licenses/by/4.0/>
